# Supplementary material
Source: PubMed Central journal article supplement (PMC10463176)

## Supplemental Online Content

Nicholls SJ, Nissen SE, Fleming C, et al. Muvalaplin, an oral small-molecule inhibitor of lipoprotein(a) formation: a randomized clinical trial. *JAMA*. doi:

**eTable 1.** Summary Statistics of Muvalaplin Dose Proportionality Analysis

**eTable 2.** Treatment-Emergent Adverse Events by System Organ Class and Preferred Term (Single Ascending Dose Part)

**eTable 3.** Treatment-Emergent Adverse Events by System Organ Class and Preferred Term (Multiple Ascending Dose Part)

**eFigure 1.** Study Design

**eFigure 2.** Lipoprotein Panel Change vs. Time (Multiple Ascending Dose Part)

**eFigure 3.** Other Biomarkers Panel Change vs. Time (Multiple Ascending Dose Part)

**eFigure 4.** Frequency Distribution of Lp(a) Concentration at Baseline

**eFigure 5.** Lp(a) Concentration at Baseline on a Per-Patient Basis

**eFigure 6.** Scatterplot of Concentration Changes From Baseline

This supplemental material has been provided by the authors to give readers additional information about their work.

**eTable1. Summary Statistics of Muvalaplin Dose Proportionality Analysis.**

| Part | Day | Dose Range        | Parameter            | Slope | Intercept | 95% CI |       |
|------|-----|-------------------|----------------------|-------|-----------|--------|-------|
|      |     |                   |                      |       |           | Lower  | Upper |
| SAD  | 1   | 30 mg to 800 mg   | C <sub>max</sub>     | 0.617 | 0.744     | 0.449  | 0.784 |
|      |     |                   | AUC <sub>0-inf</sub> | 0.705 | 3.384     | 0.397  | 1.012 |
| MAD  | 1   | 30mg to 800 mg QD | C <sub>max</sub>     | 0.704 | 0.702     | 0.601  | 0.807 |
|      |     |                   | C <sub>max</sub>     | 0.628 | 1.144     | 0.534  | 0.722 |
|      | 14  | 30mg to 800 mg QD | AUC <sub>0-tau</sub> | 0.640 | 3.826     | 0.540  | 0.740 |

eTable 1. Muvalaplin dose proportionality analysis. Power model:  $\log(\text{PK}) = \text{slope} * \log(\text{dose}) + \text{intercept} + \text{error}$ . Dose proportionality was concluded if the 95% CI for the slope was contained completely within 0.80 to 1.25 limits. If the 95% CI was completely outside of 0.80 to 1.25 limits, then “not proportional” was concluded. If the 95% CI was partly within the limits, “inconclusive” was concluded. AUC<sub>0-inf</sub>, area under the concentration-time curve from time 0 extrapolated to infinite time; AUC<sub>0-tau</sub>, area under the plasma concentration-time curve during a dosing interval; CI, confidence interval; QD, once daily.

**eTable2. Treatment-Emergent Adverse Events by System Organ Class and Preferred Term\* (SAD Part).**

|                                                      | Muvalaplin           |                     |                     |                     |                     |                     |                     |                     |                      |
|------------------------------------------------------|----------------------|---------------------|---------------------|---------------------|---------------------|---------------------|---------------------|---------------------|----------------------|
|                                                      | Placebo              | 1 mg                | 10 mg               | 30 mg               | 100 mg              | 200 mg              | 400 mg              | 800 mg              | Overall              |
|                                                      | (N = 14)<br>E, n (%) | (N = 6)<br>E, n (%) | (N = 5)<br>E, n (%) | (N = 6)<br>E, n (%) | (N = 6)<br>E, n (%) | (N = 55)<br>E, n (%) |
| Any treatment-emergent adverse event                 | 19, 7 (50)           | 4, 3 (50)           | 9, 4 (67)           | 3, 2 (33)           | 8, 4 (67)           | 7, 4 (80)           | 5, 4 (67)           | 16, 6 (100)         | 71, 34 (62)          |
| Nervous system disorders                             | 9, 6 (43)            | 1, 1 (17)           | 2, 2 (33)           | 1, 1 (17)           | 3, 2 (33)           | 2, 2 (40)           | 2, 2 (33)           | 5, 4 (67)           | 25, 20 (36)          |
| Headache                                             | 5, 5 (36)            | 1, 1 (17)           | 2, 2 (33)           | 0                   | 2, 2 (33)           | 2, 2 (40)           | 2, 2 (33)           | 4, 4 (67)           | 18, 18 (33)          |
| Dizziness                                            | 2, 2 (14)            | 0                   | 0                   | 0                   | 1, 1 (17)           | 0                   | 0                   | 0                   | 3, 3 (5)             |
| Burning sensation                                    | 0                    | 0                   | 0                   | 0                   | 0                   | 0                   | 0                   | 1, 1 (17)           | 1, 1 (2)             |
| Presyncope                                           | 1, 1 (7)             | 0                   | 0                   | 0                   | 0                   | 0                   | 0                   | 0                   | 1, 1 (2)             |
| Restless legs syndrome                               | 0                    | 0                   | 0                   | 1, 1 (17)           | 0                   | 0                   | 0                   | 0                   | 1, 1 (2)             |
| Syncope                                              | 1, 1 (7)             | 0                   | 0                   | 0                   | 0                   | 0                   | 0                   | 0                   | 1, 1 (2)             |
| General disorders and administration site conditions | 5, 4 (29)            | 0                   | 1, 1 (17)           | 1, 1 (17)           | 1, 1 (17)           | 1, 1 (20)           | 3, 3 (50)           | 1, 1 (17)           | 13, 12 (22)          |
| Fatigue                                              | 3, 3 (21)            | 0                   | 0                   | 1, 1 (17)           | 0                   | 1, 1 (20)           | 0                   | 1, 1 (17)           | 6, 6 (11)            |
| Catheter site pain                                   | 0                    | 0                   | 0                   | 0                   | 0                   | 0                   | 2, 2 (33)           | 0                   | 2, 2 (4)             |
| Asthenia                                             | 0                    | 0                   | 0                   | 0                   | 1, 1 (17)           | 0                   | 0                   | 0                   | 1, 1 (2)             |
| Catheter site swelling                               | 1, 1 (7)             | 0                   | 0                   | 0                   | 0                   | 0                   | 0                   | 0                   | 1, 1 (2)             |
| Medical device site pruritus                         | 0                    | 0                   | 1, 1 (17)           | 0                   | 0                   | 0                   | 0                   | 0                   | 1, 1 (2)             |
| Vessel puncture site erythema                        | 1, 1 (7)             | 0                   | 0                   | 0                   | 0                   | 0                   | 0                   | 0                   | 1, 1 (2)             |
| Vessel puncture site pain                            | 0                    | 0                   | 0                   | 0                   | 0                   | 0                   | 1, 1 (17)           | 0                   | 1, 1 (2)             |
| Musculoskeletal and connective tissue disorders      | 0                    | 1, 1 (17)           | 2, 2 (33)           | 1, 1 (17)           | 3, 3 (50)           | 0                   | 0                   | 0                   | 7, 7 (13)            |
| Back pain                                            | 0                    | 1, 1 (17)           | 2, 2 (33)           | 1, 1 (17)           | 3, 3 (50)           | 0                   | 0                   | 0                   | 7, 7 (13)            |
| Gastrointestinal disorders                           | 0                    | 0                   | 1, 1 (17)           | 0                   | 1, 1 (17)           | 3, 2 (40)           | 0                   | 6, 2 (33)           | 11, 6 (11)           |
| Diarrhea                                             | 0                    | 0                   | 0                   | 0                   | 0                   | 2, 2 (40)           | 0                   | 0                   | 2, 2 (4)             |
| Nausea                                               | 0                    | 0                   | 1, 1 (17)           | 0                   | 0                   | 0                   | 0                   | 2, 1 (17)           | 3, 2 (4)             |
| Abdominal distension                                 | 0                    | 0                   | 0                   | 0                   | 0                   | 0                   | 0                   | 1, 1 (17)           | 1, 1 (2)             |
| Abdominal pain                                       | 0                    | 0                   | 0                   | 0                   | 1, 1 (17)           | 0                   | 0                   | 0                   | 1, 1 (2)             |
| Gastrointestinal sounds abnormal                     | 0                    | 0                   | 0                   | 0                   | 0                   | 1, 1 (20)           | 0                   | 0                   | 1, 1 (2)             |
| Vomiting                                             | 0                    | 0                   | 0                   | 0                   | 0                   | 0                   | 0                   | 3, 1 (17)           | 3, 1 (2)             |
| Injury, poisoning and procedural complications       | 2, 2 (14)            | 2, 2 (33)           | 0                   | 0                   | 0                   | 0                   | 0                   | 3, 2 (33)           | 7, 6 (11)            |

|                                                 |          |           |           |   |   |           |   |           |          |
|-------------------------------------------------|----------|-----------|-----------|---|---|-----------|---|-----------|----------|
| Contusion                                       | 1, 1 (7) | 0         | 0         | 0 | 0 | 0         | 0 | 0         | 1, 1 (2) |
| Fall                                            | 0        | 0         | 0         | 0 | 0 | 0         | 0 | 1, 1 (17) | 1, 1 (2) |
| Hand fracture                                   | 0        | 0         | 0         | 0 | 0 | 0         | 0 | 1, 1 (17) | 1, 1 (2) |
| Joint dislocation                               | 1, 1 (7) | 0         | 0         | 0 | 0 | 0         | 0 | 0         | 1, 1 (2) |
| Procedural dizziness                            | 0        | 1, 1 (17) | 0         | 0 | 0 | 0         | 0 | 0         | 1, 1 (2) |
| Procedural nausea                               | 0        | 1, 1 (17) | 0         | 0 | 0 | 0         | 0 | 0         | 1, 1 (2) |
| Traumatic hematoma                              | 0        | 0         | 0         | 0 | 0 | 0         | 0 | 1, 1 (17) | 1, 1 (2) |
| Skin and subcutaneous tissue disorders          | 1, 1 (7) | 0         | 0         | 0 | 0 | 1, 1 (20) | 0 | 1, 1 (17) | 3, 3 (5) |
| Dry skin                                        | 1, 1 (7) | 0         | 0         | 0 | 0 | 0         | 0 | 0         | 1, 1 (2) |
| Pruritus                                        | 0        | 0         | 0         | 0 | 0 | 1, 1 (20) | 0 | 0         | 1, 1 (2) |
| Skin irritation                                 | 0        | 0         | 0         | 0 | 0 | 0         | 0 | 1, 1 (17) | 1, 1 (2) |
| Infections and infestations                     | 0        | 0         | 2, 2 (33) | 0 | 0 | 0         | 0 | 0         | 2, 2 (4) |
| COVID-19                                        | 0        | 0         | 2, 2 (33) | 0 | 0 | 0         | 0 | 0         | 2, 2 (4) |
| Cardiac disorders                               | 1, 1 (7) | 0         | 0         | 0 | 0 | 0         | 0 | 0         | 1, 1 (2) |
| Palpitations                                    | 1, 1 (7) | 0         | 0         | 0 | 0 | 0         | 0 | 0         | 1, 1 (2) |
| Reproductive system and breast disorders        | 1, 1 (7) | 0         | 0         | 0 | 0 | 0         | 0 | 0         | 1, 1 (2) |
| Dysmenorrhea                                    | 1, 1 (7) | 0         | 0         | 0 | 0 | 0         | 0 | 0         | 1, 1 (2) |
| Respiratory, thoracic and mediastinal disorders | 0        | 0         | 1, 1 (17) | 0 | 0 | 0         | 0 | 0         | 1, 1 (2) |
| Nasal congestion                                | 0        | 0         | 1, 1 (17) | 0 | 0 | 0         | 0 | 0         | 1, 1 (2) |

eTable 2. Treatment-emergent adverse events by system organ class and preferred term in the single ascending dose (SAD) part. \* AEs are coded using MedDRA Version 23.1. AE=adverse event; E=number of AEs; MedDRA=Medical Dictionary for Regulatory Activities; N=number of subjects exposed; n=number of subjects who experienced the AEs; TEAE=treatment-emergent adverse event; %=number of subjects (n) as a percentage of number of subjects (N) per treatment.

**eTable 3. Treatment-Emergent Adverse Events by System Organ Class and Preferred Term\* (MAD Part).**

|                                                      | Muvalaplin           |                     |                     |                     |                     |                      |                      |
|------------------------------------------------------|----------------------|---------------------|---------------------|---------------------|---------------------|----------------------|----------------------|
|                                                      | Placebo QD           | 30 mg QD            | 100 mg QD           | 300 mg QD           | 500 mg QD           | 800 mg QD            | Overall              |
|                                                      | (N = 11)<br>E, n (%) | (N = 8)<br>E, n (%) | (N = 8)<br>E, n (%) | (N = 9)<br>E, n (%) | (N = 8)<br>E, n (%) | (N = 15)<br>E, n (%) | (N = 59)<br>E, n (%) |
| Any treatment-emergent adverse event                 | 36, 9 (82)           | 30, 7 (88)          | 24, 5 (63)          | 48, 7 (78)          | 17, 7 (88)          | 20, 12 (80)          | 175, 47 (80)         |
| Gastrointestinal disorders                           | 12, 4 (36)           | 6, 4 (50)           | 7, 2 (25)           | 12, 7 (78)          | 2, 2 (25)           | 6, 5 (33)            | 45, 24 (41)          |
| Diarrhea                                             | 1, 1 (9)             | 1, 1 (13)           | 3, 2 (25)           | 4, 4 (44)           | 1, 1 (13)           | 3, 3 (20)            | 13, 12 (20)          |
| Abdominal pain                                       | 4, 2 (18)            | 3, 3 (38)           | 0                   | 4, 4 (44)           | 0                   | 0                    | 11, 9 (15)           |
| Nausea                                               | 2, 2 (18)            | 1, 1 (13)           | 1, 1 (13)           | 2, 2 (22)           | 0                   | 0                    | 6, 6 (10)            |
| Gastrointestinal sounds abnormal                     | 0                    | 0                   | 0                   | 1, 1 (11)           | 1, 1 (13)           | 1, 1 (7)             | 3, 3 (5)             |
| Abdominal discomfort                                 | 2, 2 (18)            | 0                   | 0                   | 0                   | 0                   | 0                    | 2, 2 (3)             |
| Abdominal distension                                 | 0                    | 0                   | 1, 1 (13)           | 1, 1 (11)           | 0                   | 0                    | 2, 2 (3)             |
| Abdominal pain upper                                 | 1, 1 (9)             | 0                   | 0                   | 0                   | 0                   | 1, 1 (7)             | 2, 2 (3)             |
| Change of bowel habit                                | 1, 1 (9)             | 0                   | 0                   | 0                   | 0                   | 0                    | 1, 1 (2)             |
| Dyspepsia                                            | 0                    | 1, 1 (13)           | 0                   | 0                   | 0                   | 0                    | 1, 1 (2)             |
| Flatulence                                           | 0                    | 0                   | 1, 1 (13)           | 0                   | 0                   | 0                    | 1, 1 (2)             |
| Gastric disorder                                     | 0                    | 0                   | 1, 1 (13)           | 0                   | 0                   | 0                    | 1, 1 (2)             |
| Lip dry                                              | 1, 1 (9)             | 0                   | 0                   | 0                   | 0                   | 0                    | 1, 1 (2)             |
| Toothache                                            | 0                    | 0                   | 0                   | 0                   | 0                   | 1, 1 (7)             | 1, 1 (2)             |
| Nervous system disorders                             | 7, 5 (45)            | 8, 5 (63)           | 1, 1 (13)           | 8, 5 (56)           | 5, 3 (38)           | 7, 5 (33)            | 36, 24 (41)          |
| Headache                                             | 4, 4 (36)            | 5, 4 (50)           | 1, 1 (13)           | 7, 4 (44)           | 3, 2 (25)           | 4, 3 (20)            | 24, 18 (31)          |
| Dizziness                                            | 0                    | 0                   | 0                   | 1, 1 (11)           | 1, 1 (13)           | 1, 1 (7)             | 3, 3 (5)             |
| Paraesthesia                                         | 0                    | 3, 3 (38)           | 0                   | 0                   | 0                   | 0                    | 3, 3 (5)             |
| Poor quality sleep                                   | 0                    | 0                   | 0                   | 0                   | 0                   | 2, 2 (13)            | 2, 2 (3)             |
| Lethargy                                             | 0                    | 0                   | 0                   | 0                   | 1, 1 (13)           | 0                    | 1, 1 (2)             |
| Presyncope                                           | 1, 1 (9)             | 0                   | 0                   | 0                   | 0                   | 0                    | 1, 1 (2)             |
| Sleep paralysis                                      | 1, 1 (9)             | 0                   | 0                   | 0                   | 0                   | 0                    | 1, 1 (2)             |
| Tremor                                               | 1, 1 (9)             | 0                   | 0                   | 0                   | 0                   | 0                    | 1, 1 (2)             |
| General disorders and administration site conditions | 4, 3 (27)            | 8, 5 (63)           | 5, 3 (38)           | 9, 5 (56)           | 4, 3 (38)           | 2, 2 (13)            | 32, 21 (36)          |
| Fatigue                                              | 0                    | 0                   | 0                   | 4, 3 (33)           | 2, 2 (25)           | 1, 1 (7)             | 7, 6 (10)            |

|                                                 |           |           |           |           |           |           |             |
|-------------------------------------------------|-----------|-----------|-----------|-----------|-----------|-----------|-------------|
| Catheter site pain                              | 0         | 3, 2 (25) | 2, 2 (25) | 1, 1 (11) | 0         | 0         | 6, 5 (8)    |
| Vessel puncture site bruise                     | 2, 2 (18) | 0         | 1, 1 (13) | 3, 2 (22) | 0         | 0         | 6, 5 (8)    |
| Catheter site bruise                            | 1, 1 (9)  | 0         | 0         | 1, 1 (11) | 0         | 0         | 2, 2 (3)    |
| Drug withdrawal syndrome                        | 0         | 2, 2 (25) | 0         | 0         | 0         | 0         | 2, 2 (3)    |
| Vessel puncture site pain                       | 0         | 1, 1 (13) | 0         | 0         | 0         | 1, 1 (7)  | 2, 2 (3)    |
| Application site pruritus                       | 0         | 0         | 0         | 0         | 1, 1 (13) | 0         | 1, 1 (2)    |
| Catheter site swelling                          | 0         | 1, 1 (13) | 0         | 0         | 0         | 0         | 1, 1 (2)    |
| Feeling cold                                    | 0         | 1, 1 (13) | 0         | 0         | 0         | 0         | 1, 1 (2)    |
| Influenza like illness                          | 0         | 0         | 1, 1 (13) | 0         | 0         | 0         | 1, 1 (2)    |
| Medical device site erythema                    | 0         | 0         | 1, 1 (13) | 0         | 0         | 0         | 1, 1 (2)    |
| Vaccination site pain                           | 1, 1 (9)  | 0         | 0         | 0         | 0         | 0         | 1, 1 (2)    |
| Vessel puncture site erythema                   | 0         | 0         | 0         | 0         | 1, 1 (13) | 0         | 1, 1 (2)    |
| Musculoskeletal and connective tissue disorders | 2, 2 (18) | 4, 4 (50) | 3, 2 (25) | 4, 2 (22) | 1, 1 (13) | 0         | 14, 11 (19) |
| Back pain                                       | 1, 1 (9)  | 0         | 1, 1 (13) | 2, 2 (22) | 0         | 0         | 4, 4 (7)    |
| Arthralgia                                      | 1, 1 (9)  | 1, 1 (13) | 0         | 2, 1 (11) | 0         | 0         | 4, 3 (5)    |
| Muscle spasms                                   | 0         | 2, 2 (25) | 0         | 0         | 0         | 0         | 2, 2 (3)    |
| Musculoskeletal chest pain                      | 0         | 0         | 0         | 0         | 1, 1 (13) | 0         | 1, 1 (2)    |
| Myalgia                                         | 0         | 1, 1 (13) | 0         | 0         | 0         | 0         | 1, 1 (2)    |
| Pain in extremity                               | 0         | 0         | 2, 1 (13) | 0         | 0         | 0         | 2, 1 (2)    |
| Skin and subcutaneous tissue disorders          | 3, 3 (27) | 1, 1 (13) | 6, 3 (38) | 3, 3 (33) | 0         | 0         | 13, 10 (17) |
| Acne                                            | 1, 1 (9)  | 1, 1 (13) | 2, 2 (25) | 1, 1 (11) | 0         | 0         | 5, 5 (8)    |
| Dry skin                                        | 0         | 0         | 2, 2 (25) | 1, 1 (11) | 0         | 0         | 3, 3 (5)    |
| Erythema                                        | 0         | 0         | 1, 1 (3)  | 0         | 0         | 0         | 1, 1 (2)    |
| Hyperhidrosis                                   | 1, 1 (9)  | 0         | 0         | 0         | 0         | 0         | 1, 1 (2)    |
| Night sweats                                    | 0         | 0         | 0         | 1, 1 (11) | 0         | 0         | 1, 1 (2)    |
| Rash                                            | 0         | 0         | 1, 1 (13) | 0         | 0         | 0         | 1, 1 (2)    |
| Skin fissures                                   | 1, 1 (9)  | 0         | 0         | 0         | 0         | 0         | 1, 1 (2)    |
| Injury, poisoning and procedural complications  | 1, 1 (9)  | 1, 1 (13) | 1, 1 (13) | 1, 1 (11) | 0         | 2, 2 (13) | 6, 6 (10)   |
| Contusion                                       | 0         | 0         | 0         | 1, 1 (11) | 0         | 0         | 1, 1 (2)    |
| Injury                                          | 0         | 0         | 1, 1 (13) | 0         | 0         | 0         | 1, 1 (2)    |
| Procedural dizziness                            | 1, 1 (9)  | 0         | 0         | 0         | 0         | 0         | 1, 1 (2)    |

|                                                 |           |           |           |           |           |           |          |
|-------------------------------------------------|-----------|-----------|-----------|-----------|-----------|-----------|----------|
| Traumatic hematoma                              | 0         | 0         | 0         | 0         | 0         | 1, 1 (7)  | 1, 1 (2) |
| Ulnar nerve injury                              | 0         | 1, 1 (13) | 0         | 0         | 0         | 0         | 1, 1 (2) |
| Wrist fracture                                  | 0         | 0         | 0         | 0         | 0         | 1, 1 (7)  | 1, 1 (2) |
| Respiratory, thoracic and mediastinal disorders | 0         | 0         | 1, 1 (13) | 4, 3 (33) | 0         | 1, 1 (7)  | 6, 5 (8) |
| Epistaxis                                       | 0         | 0         | 1, 1 (13) | 3, 2 (22) | 0         | 0         | 4, 3 (5) |
| Nasal dryness                                   | 0         | 0         | 0         | 1, 1 (11) | 0         | 0         | 1, 1 (2) |
| Oropharyngeal pain                              | 0         | 0         | 0         | 0         | 0         | 1, 1 (7)  | 1, 1 (2) |
| Infections and infestations                     | 1, 1 (9)  | 1, 1 (13) | 0         | 0         | 0         | 2, 2 (13) | 4, 4 (7) |
| Asymptomatic COVID-19                           | 0         | 1, 1 (13) | 0         | 0         | 0         | 0         | 1, 1 (2) |
| COVID-19                                        | 0         | 0         | 0         | 0         | 0         | 1, 1 (7)  | 1, 1 (2) |
| Gingivitis                                      | 0         | 0         | 0         | 0         | 0         | 1, 1 (7)  | 1, 1 (2) |
| Nasopharyngitis                                 | 1, 1 (9)  | 0         | 0         | 0         | 0         | 0         | 1, 1 (2) |
| Ear and labyrinth disorders                     | 0         | 1, 1 (13) | 0         | 0         | 2, 2 (25) | 0         | 3, 3 (5) |
| Ear pain                                        | 0         | 1, 1 (13) | 0         | 0         | 1, 1 (13) | 0         | 2, 2 (3) |
| External ear inflammation                       | 0         | 0         | 0         | 0         | 1, 1 (13) | 0         | 1, 1 (2) |
| Renal and urinary disorders                     | 2, 1 (9)  | 0         | 0         | 1, 1 (11) | 1, 1 (13) | 0         | 4, 3 (5) |
| Pollakiuria                                     | 1, 1 (9)  | 0         | 0         | 1, 1 (11) | 1, 1 (13) | 0         | 3, 3 (5) |
| Chromaturia                                     | 1, 1 (9)  | 0         | 0         | 0         | 0         | 0         | 1, 1 (2) |
| Reproductive system and breast disorders        | 1, 1 (9)  | 0         | 0         | 2, 2 (22) | 0         | 0         | 3, 3 (5) |
| Dysmenorrhea                                    | 1, 1 (9)  | 0         | 0         | 2, 2 (22) | 0         | 0         | 3, 3 (5) |
| Metabolism and nutrition disorders              | 0         | 0         | 0         | 2, 2 (22) | 0         | 0         | 2, 2 (3) |
| Decreased appetite                              | 0         | 0         | 0         | 2, 2 (22) | 0         | 0         | 2, 2 (3) |
| Psychiatric disorders                           | 2, 2 (18) | 0         | 0         | 0         | 0         | 0         | 2, 2 (3) |
| Insomnia                                        | 1, 1 (9)  | 0         | 0         | 0         | 0         | 0         | 1, 1 (2) |
| Nightmare                                       | 1, 1 (9)  | 0         | 0         | 0         | 0         | 0         | 1, 1 (2) |
| Vascular disorders                              | 0         | 0         | 0         | 1, 1 (11) | 1, 1 (13) | 0         | 2, 2 (3) |
| Hot flush                                       | 0         | 0         | 0         | 1, 1 (11) | 1, 1 (13) | 0         | 2, 2 (3) |
| Cardiac disorders                               | 1, 1 (9)  | 0         | 0         | 0         | 0         | 0         | 1, 1 (2) |
| Cardiac discomfort                              | 1, 1 (9)  | 0         | 0         | 0         | 0         | 0         | 1, 1 (2) |
| Eye disorders                                   | 0         | 0         | 0         | 1, 1 (11) | 0         | 0         | 1, 1 (2) |
| Dry eye                                         | 0         | 0         | 0         | 1, 1 (11) | 0         | 0         | 1, 1 (2) |
| Social circumstances                            | 0         | 0         | 0         | 0         | 1, 1 (13) | 0         | 1, 1 (2) |

Exercise lack of

0

0

0

0

1, 1 (13)

0

1, 1 (2)

---

Supplementary Table 3. Treatment-emergent adverse events by system organ class and preferred term in the multiple ascending dose (MAD) part. \*AEs are coded using MedDRA Version 23.1. AE=adverse event; E=number of AEs; MedDRA=Medical Dictionary for Regulatory Activities; N=number of subjects exposed; n=number of subjects who experienced the AEs; QD=once daily; TEAE=treatment-emergent adverse event; %=number of subjects (n) as a percentage of number of subjects (N) per treatment.



**eFigure 1. Study Design.**

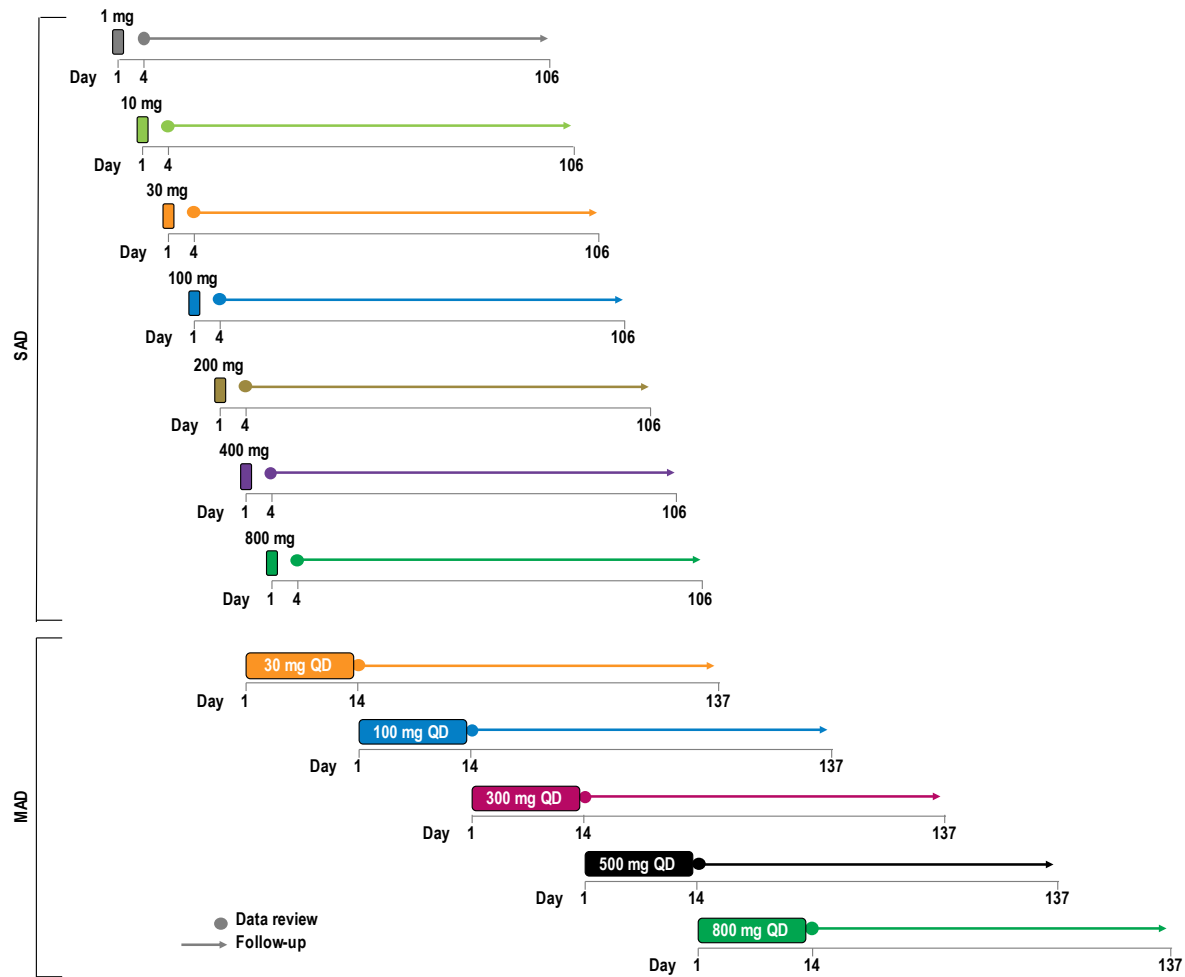

Supplementary Figure 1. Study design. MAD, multiple ascending dose; QD, once daily; SAD, single ascending dose.

eFigure 2. Lipoprotein Panel Change vs. Time (Multiple Ascending Dose Part).

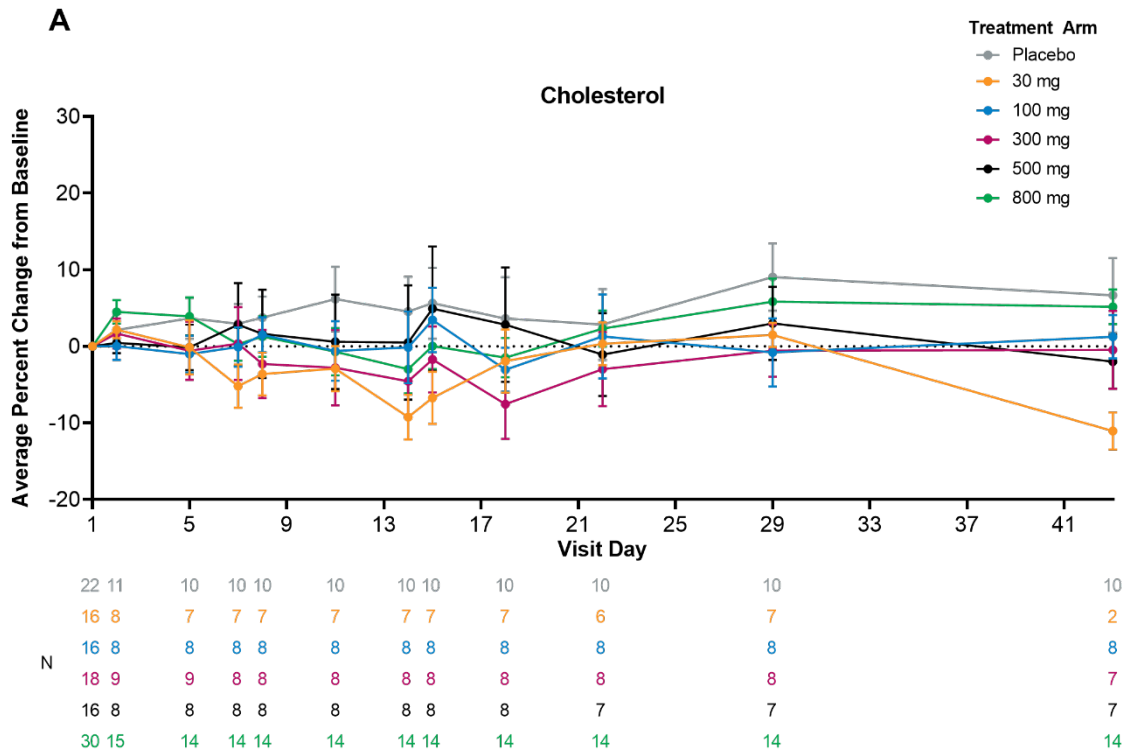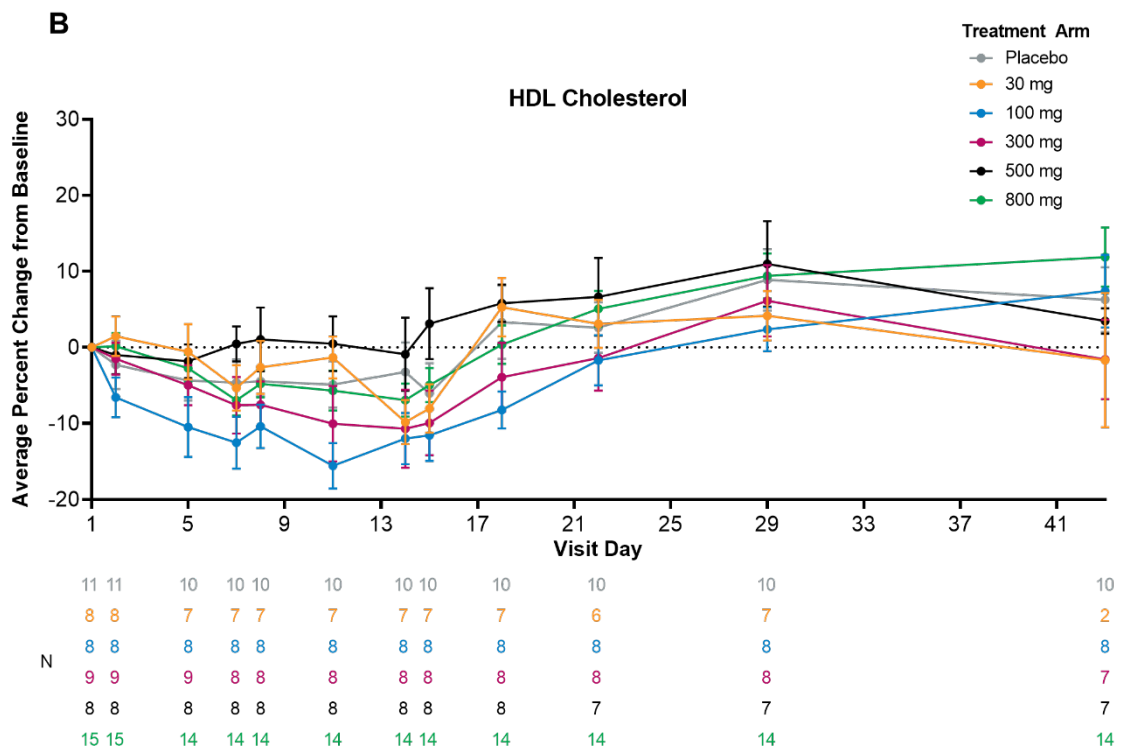

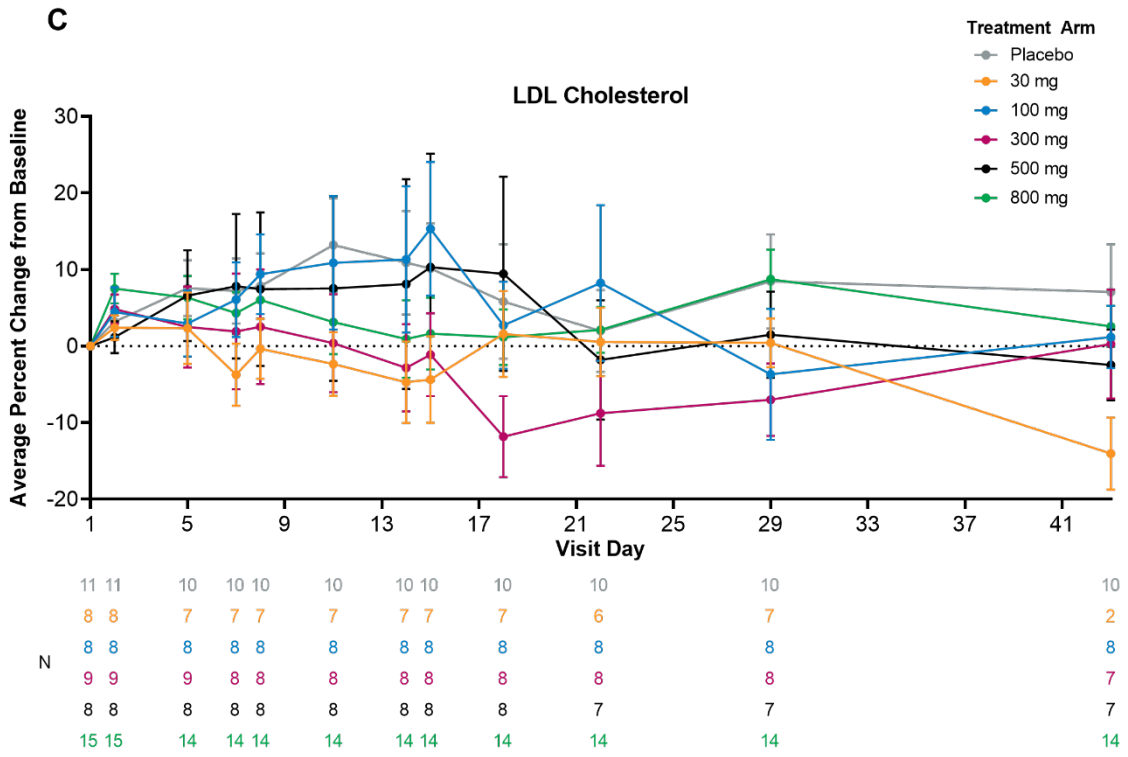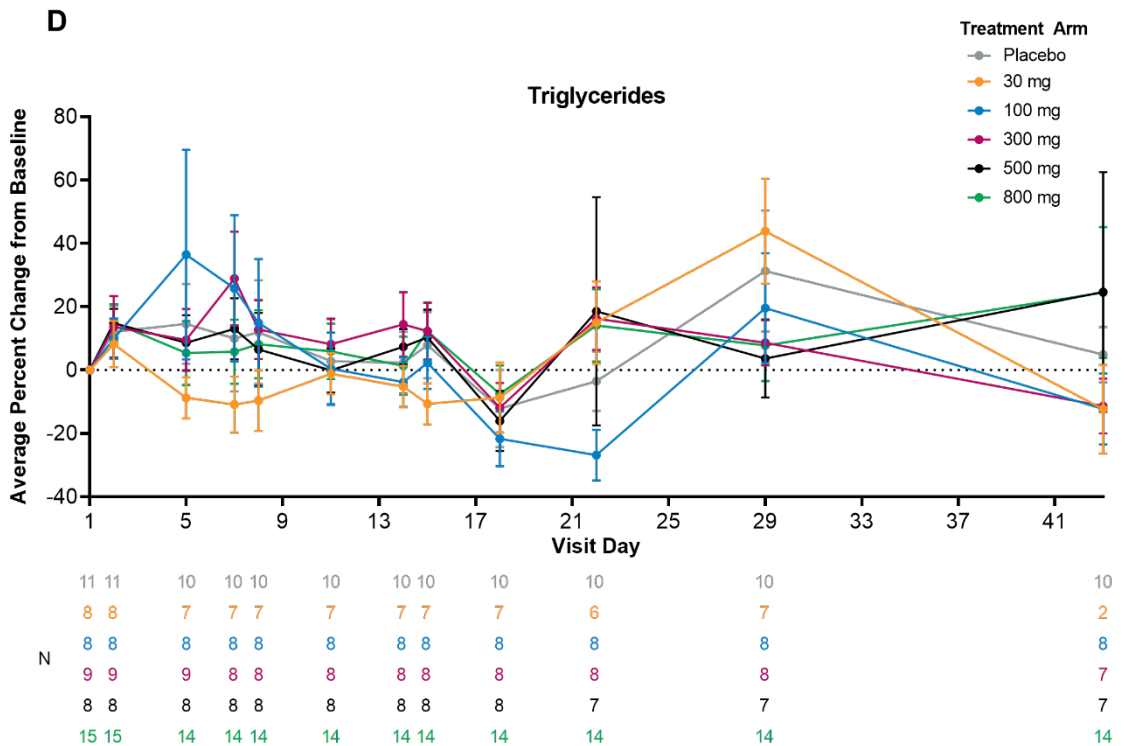

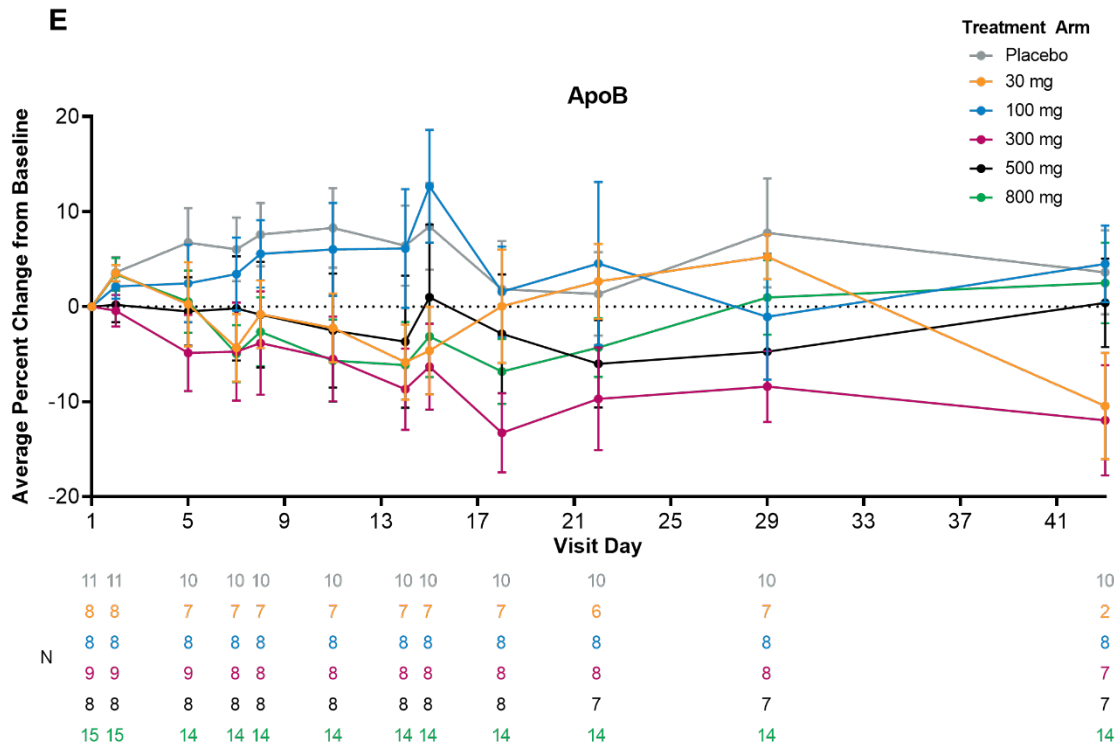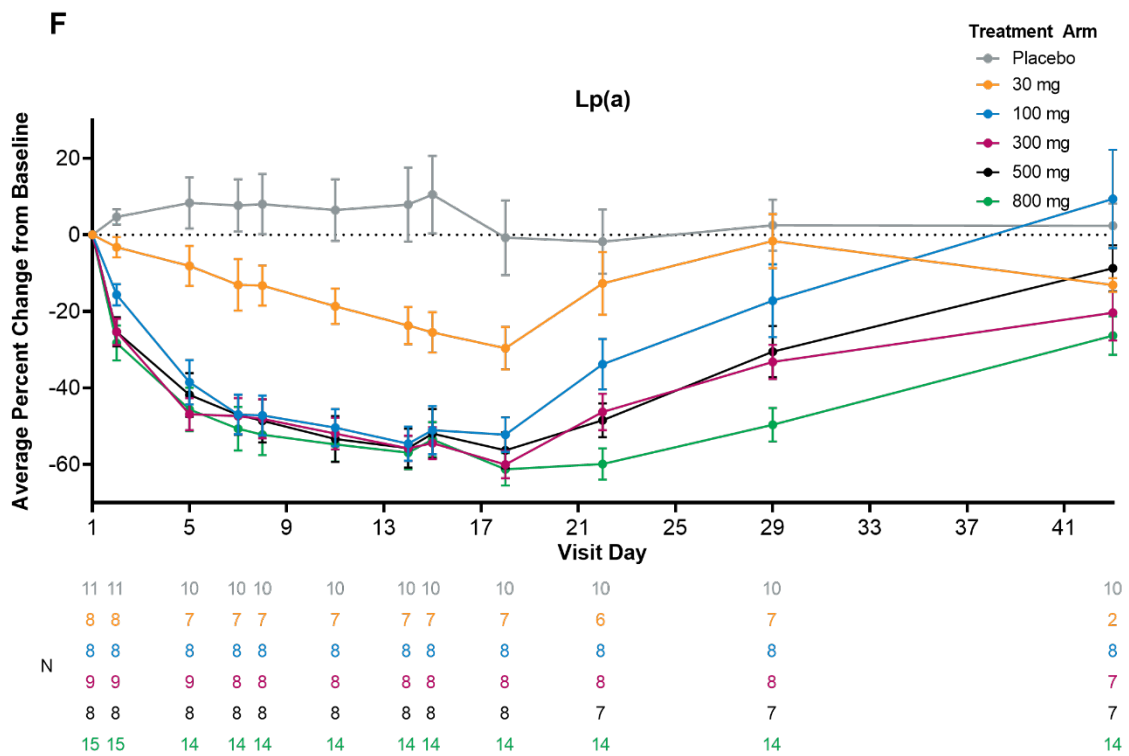

Supplementary Figure 2. Changes in lipid parameters during the multiple ascending dose study. HDL, high-density lipoprotein; LDL, low-density lipoprotein; ApoB, apolipoprotein B; Lp(a), lipoprotein(a).

eFigure 3. Other Biomarkers Panel Change vs. Time (Multiple Ascending Dose Part).

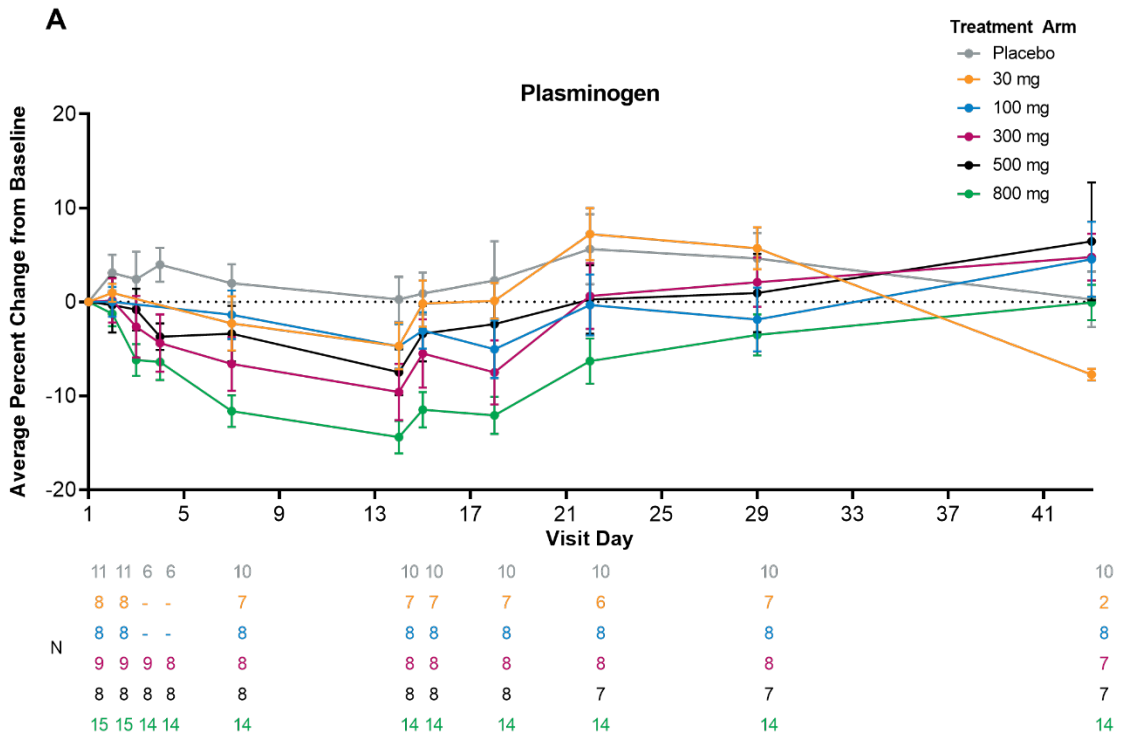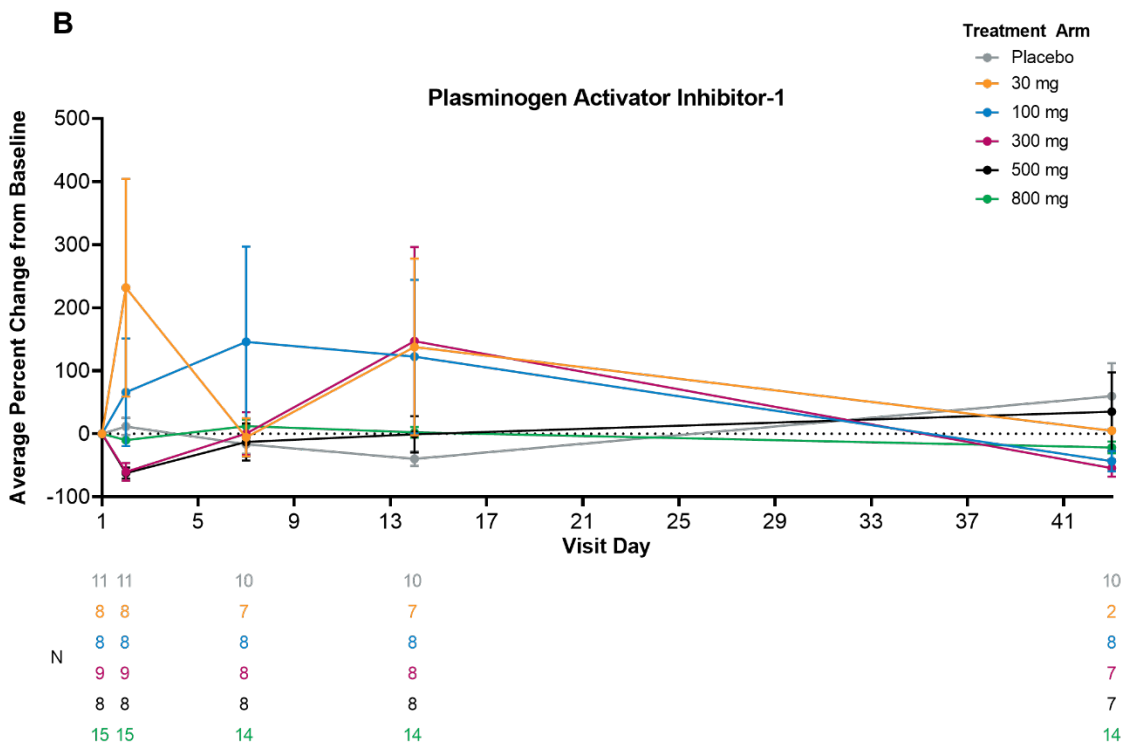

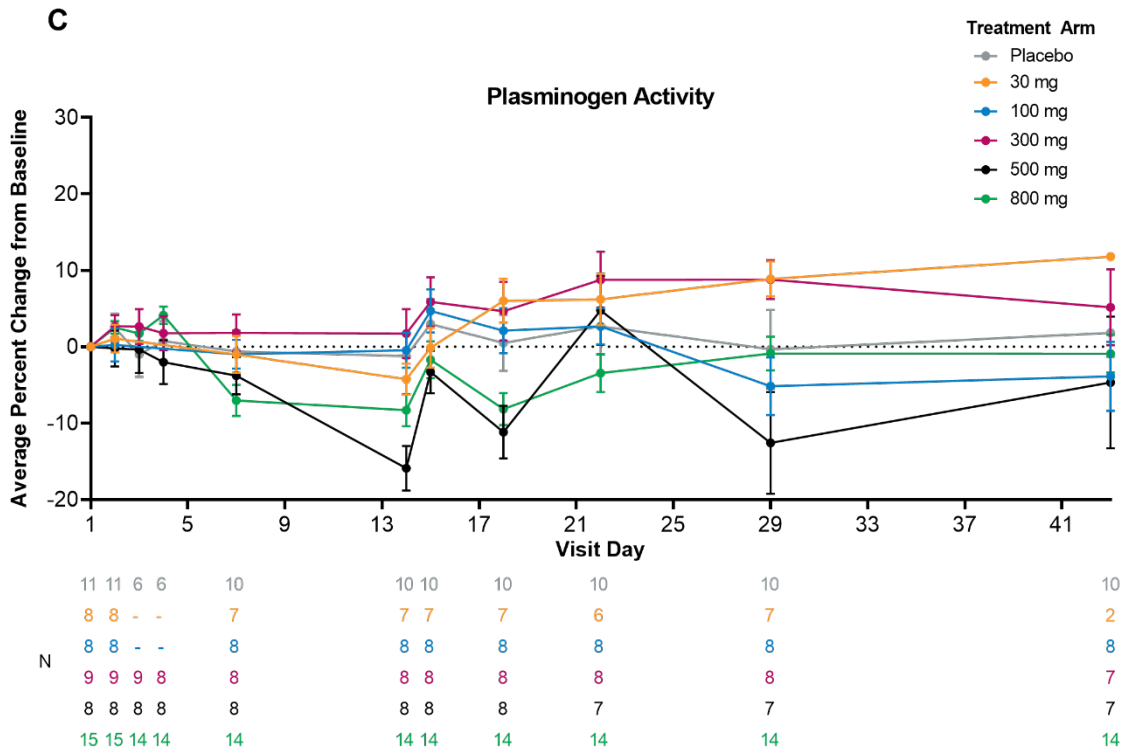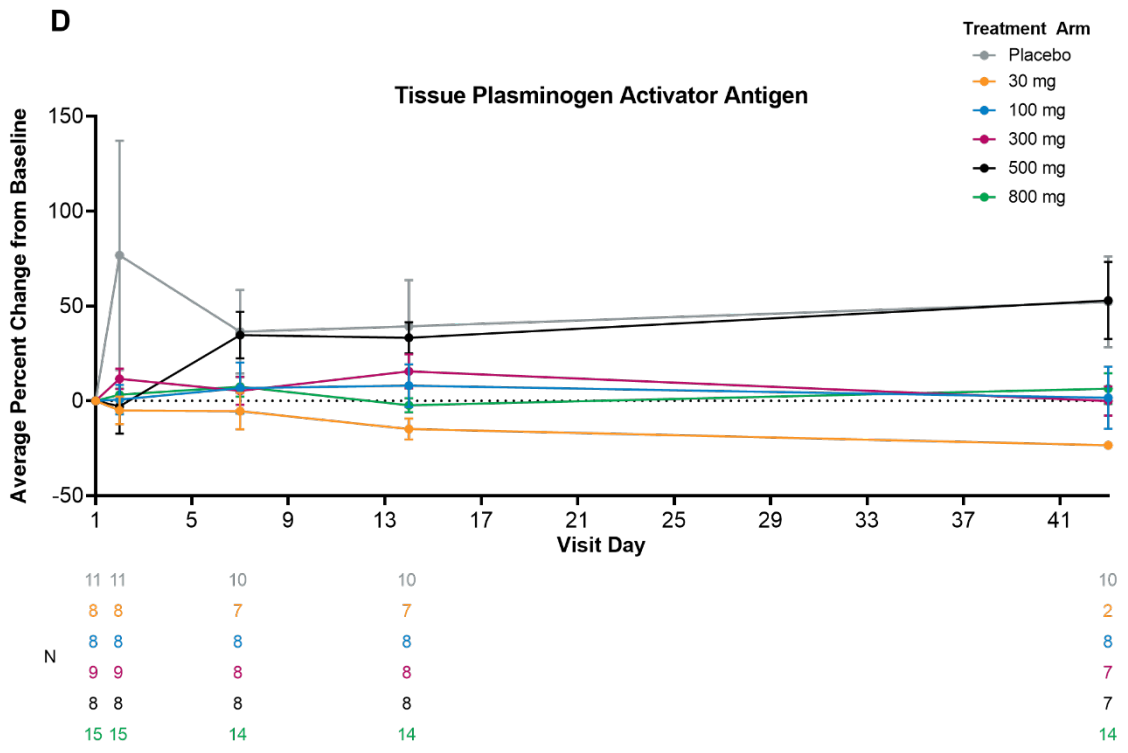

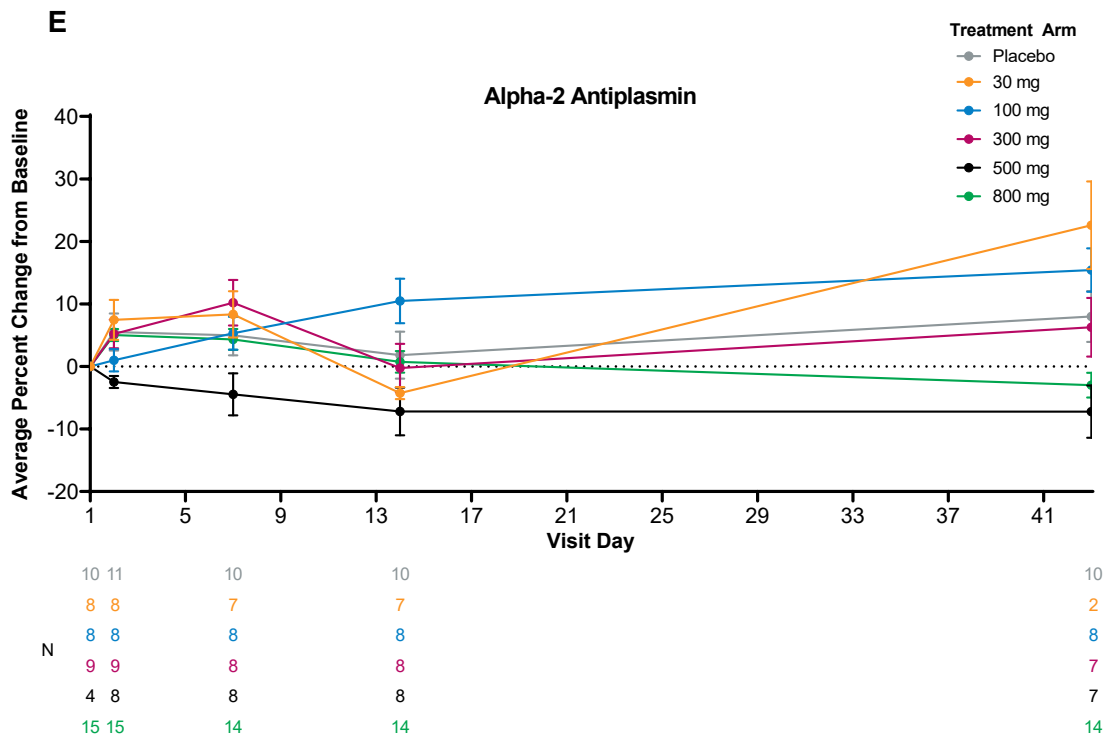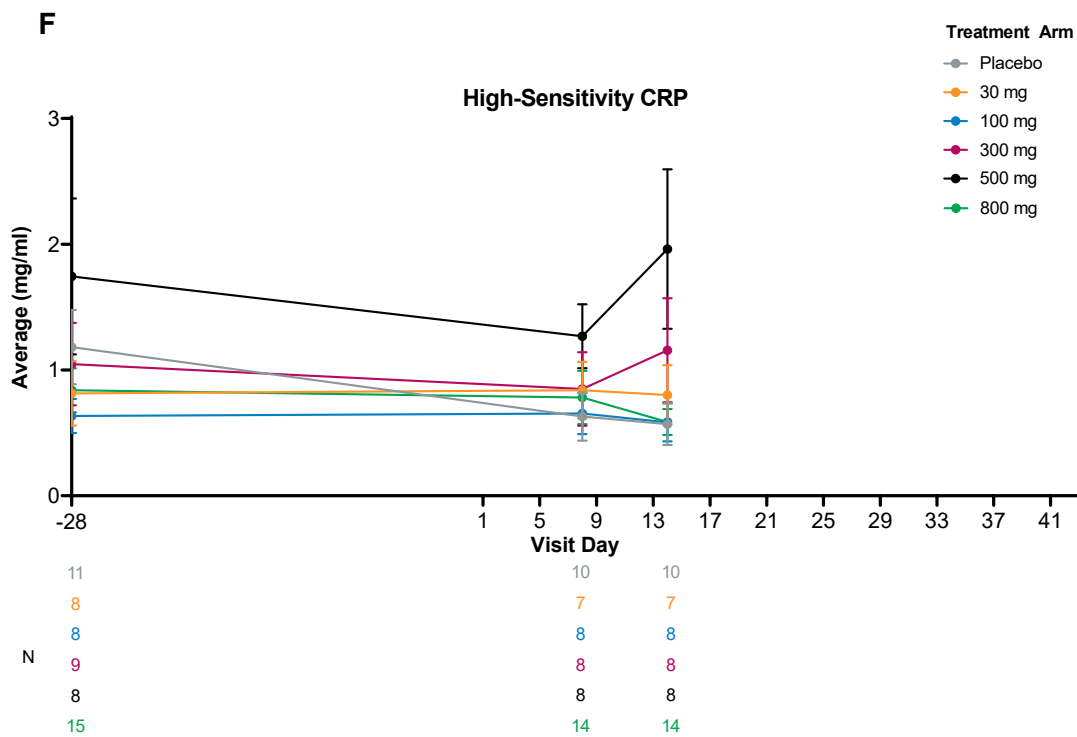

Supplementary Figure 3. Changes in non-lipid biomarkers during the multiple ascending dose study. CRP, C-reactive protein.

eFigure 4. Frequency Distribution of Lp(a) Concentration at Baseline

A

Frequency Distribution of Lp(a) Concentration at Baseline in the Single Ascending Dose Cohort

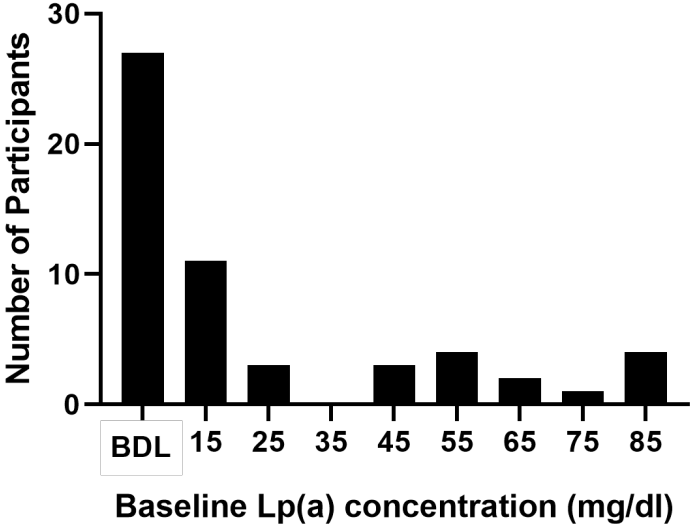

BDL=below detection limit (detection limit =10 mg/dl)

B

Frequency Distribution of Lp(a) Concentration at Baseline in the Multiple Ascending Dose Cohort

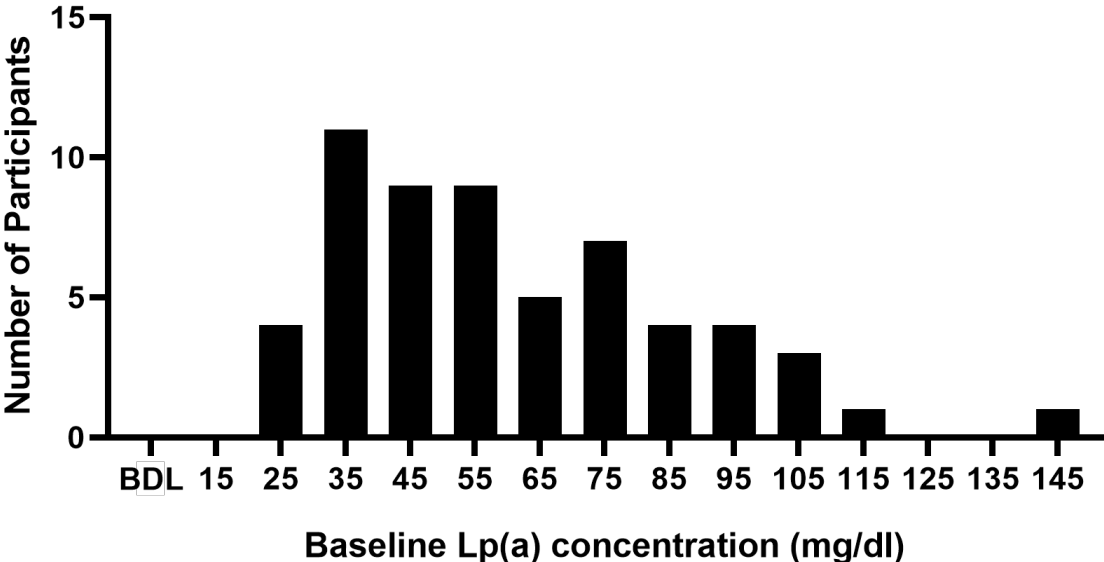

BDL=below detection limit (detection limit =10 mg/dl)



eFigure 5. Lp(a) Concentration at Baseline on a Per-Patient Basis

A

Lp(a) Individual Patient's Concentration at Baseline in the Single Ascending Dose Cohort

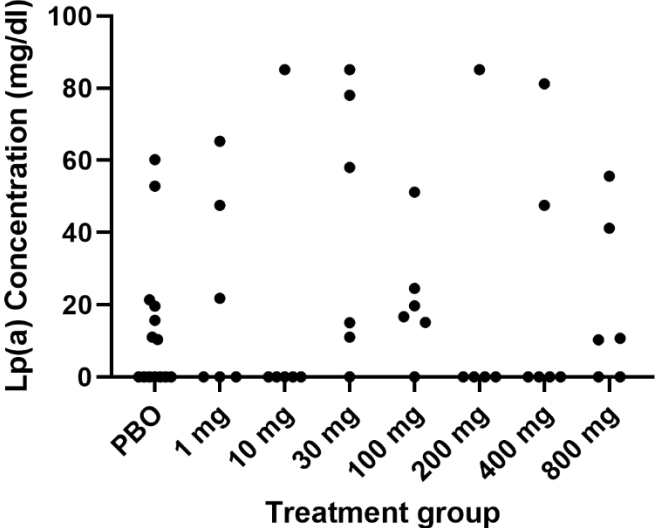

Each dot represents a single participant.  
A value of zero was assigned to participants with Lp(a) concentration below the detection limit (10 mg/dl).

B

Lp(a) Individual Patient's Concentration at Baseline in the Multiple Ascending Dose Cohort

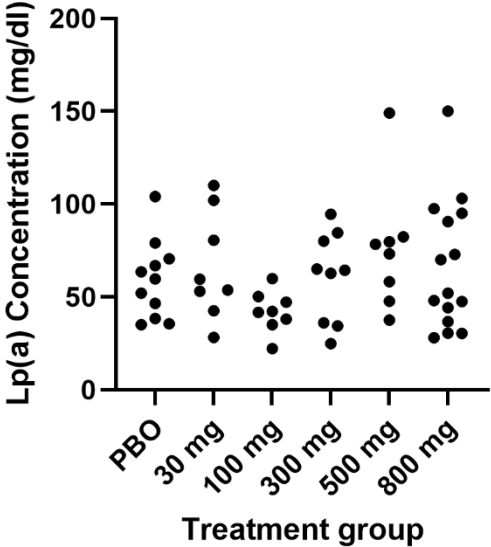

Each dot represents a single participant

eFigure 6. Scatterplot of Concentration Changes From Baseline

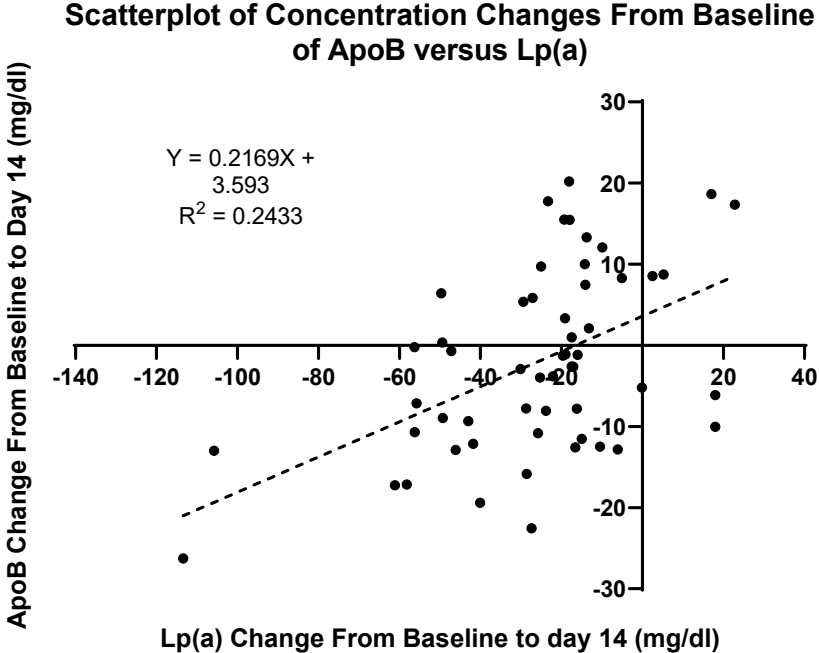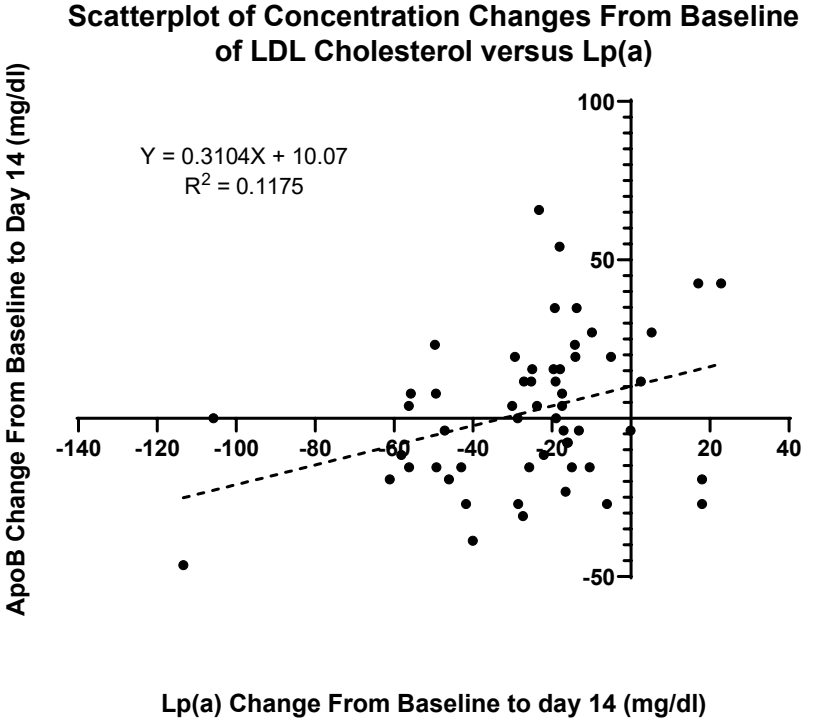

Supplement: jama-e2316503-s003.pdf [file jama-e2316503-s003.pdf]
