# Supplementary material
Source: PubMed Central journal article supplement (PMC10463176)
Supplement: jama-e2316503-s002.pdf [file jama-e2316503-s002.pdf]

# Statistical Analysis Plan

|                        |                                                                                                                             |
|------------------------|-----------------------------------------------------------------------------------------------------------------------------|
| <b>Sponsor:</b>        | Eli Lilly and Company                                                                                                       |
| <b>Protocol No:</b>    | J2O-MC-EKBA(c)                                                                                                              |
| <b>Protocol Title:</b> | A Safety, Tolerability, and Pharmacokinetic Study of Single – and Multiple-Ascending Doses of LY3473329 in Healthy Subjects |
| <b>PRA Project ID:</b> | ELL19958-19958X                                                                                                             |
| <b>Version Date:</b>   | 14-Oct-2021 (SAP) V2                                                                                                        |

## 1.0 Approvals

The undersigned have approved this Statistical Analysis Plan for use in this study.

|                                                    |                                                                                     |
|----------------------------------------------------|-------------------------------------------------------------------------------------|
| <b>Name of Sponsor Representative / Title:</b>     |  |
| <b>Signature of Sponsor Representative / Date:</b> |                                                                                     |
| <b>Name of Author / Title:</b>                     |                                                                                     |
| <b>Signature of Author / Date:</b>                 |                                                                                     |

## 2.0 Table of Contents

|                                                             |    |
|-------------------------------------------------------------|----|
| 1.0 Approvals .....                                         | 1  |
| 2.0 Table of Contents .....                                 | 2  |
| 3.0 Introduction .....                                      | 4  |
| 4.0 Changes from Previous Version of Approved SAP .....     | 4  |
| 5.0 Study Objectives .....                                  | 5  |
| Table 1 Objectives and Endpoints .....                      | 5  |
| 6.0 Study Design .....                                      | 5  |
| Figure 1 Study Design.....                                  | 6  |
| 6.1 Sample Size Considerations.....                         | 6  |
| 6.2 Randomization .....                                     | 7  |
| 7.0 Overview of Planned Analysis .....                      | 7  |
| 7.1 Changes from Protocol .....                             | 7  |
| 7.2 Interim Analysis and Key Results .....                  | 7  |
| 7.3 Final Analysis .....                                    | 7  |
| 8.0 Data Review .....                                       | 7  |
| 8.1 Data Management.....                                    | 7  |
| 8.2 Acceptance of Data for Summarization .....              | 8  |
| 9.0 Definitions and General Analysis Methods .....          | 8  |
| 9.1 Analysis Data Presentation .....                        | 8  |
| 9.1.1 Rounding.....                                         | 8  |
| 9.1.2 Imputation .....                                      | 8  |
| 9.1.3 Descriptive Statistics .....                          | 8  |
| 9.1.4 Pooling .....                                         | 8  |
| 9.1.5 Unscheduled Measurements .....                        | 8  |
| 9.2 Analysis Data Definitions .....                         | 9  |
| 9.2.1 Baseline Definition .....                             | 9  |
| 9.2.2 Treatment/Subject Grouping.....                       | 9  |
| 9.2.3 Common Variable Derivations .....                     | 10 |
| 9.2.4 QC .....                                              | 10 |
| 9.2.5 ADaM Datasets and Metadata .....                      | 10 |
| 9.3 Software .....                                          | 11 |
| 9.4 Statistical Methods .....                               | 11 |
| 9.4.1 Statistical Outlier Determination.....                | 11 |
| 9.4.2 Predetermined Covariates and Prognostic Factors ..... | 11 |
| 9.4.3 Hypothesis Testing.....                               | 11 |
| 9.5 TFL Layout .....                                        | 11 |
| 10.0 Analysis Sets.....                                     | 12 |
| 10.1 Randomized Set.....                                    | 12 |
| 10.2 Safety Set.....                                        | 12 |
| 10.3 Pharmacokinetic Set .....                              | 12 |
| 10.4 Pharmacodynamic Set.....                               | 12 |
| 11.0 Subject Disposition.....                               | 12 |
| 12.0 Protocol Deviations and Violations .....               | 12 |
| 13.0 Demographic and Baseline Characteristics .....         | 13 |
| 13.1 Demographics .....                                     | 13 |
| 13.2 Medical History.....                                   | 13 |
| 13.3 Other Baseline Characteristics .....                   | 13 |
| 14.0 Concomitant Medications.....                           | 13 |
| 15.0 Treatment Compliance and Exposure .....                | 13 |
| 16.0 Pharmacokinetic Analyses .....                         | 13 |
| 16.1 Pharmacokinetic Variables .....                        | 13 |
| 16.1.1 Plasma Variables .....                               | 13 |
| Table 2: Plasma PK Parameters.....                          | 14 |

---

|                                                                                  |    |
|----------------------------------------------------------------------------------|----|
| 16.2 Pharmacokinetic Summaries .....                                             | 15 |
| 16.2.1 Pharmacokinetic Concentrations .....                                      | 15 |
| 16.2.2 Pharmacokinetic Parameters .....                                          | 16 |
| 17.0 Pharmacodynamic Analysis .....                                              | 16 |
| 17.1 Pharmacodynamic Variables .....                                             | 16 |
| 17.1.1 Lipoprotein(a) .....                                                      | 16 |
| 17.1.2 Other Pharmacodynamic Markers .....                                       | 17 |
| 17.2 Pharmacodynamic Summaries .....                                             | 17 |
| 17.2.1 Lipoprotein(a) .....                                                      | 17 |
| 17.2.2 Other Pharmacodynamic Markers .....                                       | 17 |
| 18.0 Safety Analyses .....                                                       | 18 |
| 18.1 Safety Variables .....                                                      | 18 |
| 18.1.1 Adverse Events .....                                                      | 18 |
| 18.1.2 Deaths and Serious Adverse Events .....                                   | 19 |
| 18.1.3 Laboratory Data .....                                                     | 19 |
| 18.1.4 Vital Signs .....                                                         | 19 |
| 18.1.5 Electrocardiograms .....                                                  | 19 |
| 18.1.6 Physical Examinations .....                                               | 19 |
| 19.0 References .....                                                            | 19 |
| Appendix 1: Glossary of Abbreviations .....                                      | 20 |
| Appendix 2: Schedule of Assessments Single-Ascending Dose (SAD) – Part A .....   | 22 |
| Appendix 3: Schedule of Assessments Multiple-Ascending Dose (MAD) – Part B ..... | 24 |
| Appendix 4: List of End of Text Outputs .....                                    | 26 |
| Document History .....                                                           | 29 |

---

### 3.0 Introduction

This Statistical Analysis Plan (SAP) describes the statistical methods that will be used during the analysis and reporting of data collected under Eli Lilly and Company Protocol J2O-MC-EKBA(c).

This SAP should be read in conjunction with the study protocol and electronic case report form (eCRF). This version of the SAP has been developed using the amended protocol (Version c) approved 19-Jan-2021 (including all amendments up to this protocol date) and the final eCRF(s) dated 12-Aug-2020 (SAD), 25-Sep-2020 (MAD), 10-Mar-2021 (SAD and MAD protocol Version c).

An approved and signed SAP is a requirement for database lock. An approved SAP is also required for unblinding of the study treatments.

This SAP only covers the results that will be processed by the PRA Early Development Services (EDS) Biostatistics Department. PRA EDS will perform the pharmacokinetic (PK), pharmacodynamic (PD), and safety and tolerability evaluation.

This SAP supersedes the statistical considerations identified in the protocol; where considerations are substantially different, they will be so identified. Any post-hoc or unplanned analyses, or significant changes from the planned analysis in this SAP performed to provide results for inclusion in the clinical study report (CSR) but not included in this SAP, will be clearly identified in the CSR. Changes to planned analyses do not require an updated SAP but should be included in the CSR if significant.

### 4.0 Changes from Previous Version of Approved SAP

This is the first version of the SAP.

## 5.0 Study Objectives

The study objectives are given in [Table 1](#) below.

**Table 1 Objectives and Endpoints**

| Objectives                                                                                                                                                                  | Endpoints                                                                                                                                                                                                                                 |
|-----------------------------------------------------------------------------------------------------------------------------------------------------------------------------|-------------------------------------------------------------------------------------------------------------------------------------------------------------------------------------------------------------------------------------------|
| <b>Primary (Part A – SAD)</b>                                                                                                                                               |                                                                                                                                                                                                                                           |
| To evaluate safety and tolerability of LY3473329 in healthy subjects following a single oral dose                                                                           | <ul style="list-style-type: none"> <li>• AEs</li> <li>• SAEs</li> </ul>                                                                                                                                                                   |
| <b>Primary (Part B – MAD)</b>                                                                                                                                               |                                                                                                                                                                                                                                           |
| To evaluate safety and tolerability of LY3473329 in otherwise healthy subjects with elevated Lp(a) ( $\geq 75$ nmol/L or 30 mg/dL) following multiple once-daily oral doses | <ul style="list-style-type: none"> <li>• AEs</li> <li>• SAEs</li> </ul>                                                                                                                                                                   |
| <b>Secondary (Part A – SAD)</b>                                                                                                                                             |                                                                                                                                                                                                                                           |
| To evaluate the pharmacokinetics of LY3473329 in healthy subjects following a single oral dose                                                                              | <ul style="list-style-type: none"> <li>• AUC</li> <li>• <math>C_{max}</math></li> <li>• <math>t_{max}</math></li> </ul>                                                                                                                   |
| <b>Secondary (Part B – MAD)</b>                                                                                                                                             |                                                                                                                                                                                                                                           |
| To evaluate the pharmacokinetics of LY3473329 in otherwise healthy subjects with elevated Lp(a) ( $\geq 75$ nmol/L or 30 mg/dL) following multiple once-daily oral doses    | <ul style="list-style-type: none"> <li>• AUC</li> <li>• <math>C_{max}</math></li> <li>• <math>t_{max}</math></li> </ul>                                                                                                                   |
| <b>Exploratory (Part A – SAD)</b>                                                                                                                                           |                                                                                                                                                                                                                                           |
| To explore the mechanism of action of LY3473329 based on safety and efficacy biomarkers following a single oral dose                                                        | <ul style="list-style-type: none"> <li>• Lp(a) concentration</li> <li>• Plasminogen activity</li> <li>• Plasminogen concentration</li> <li>• hs-CRP</li> <li>• tPA</li> <li>• PAI</li> <li>• <math>\alpha_2</math>-antiplasmin</li> </ul> |
| <b>Exploratory (Part B – MAD)</b>                                                                                                                                           |                                                                                                                                                                                                                                           |
| To explore the mechanism of action of LY3473329 based on safety and efficacy biomarkers following multiple once-daily oral doses                                            | <ul style="list-style-type: none"> <li>• Lp(a) concentration</li> <li>• Plasminogen activity</li> <li>• Plasminogen concentration</li> <li>• hs-CRP</li> <li>• tPA</li> <li>• PAI</li> <li>• <math>\alpha_2</math>-antiplasmin</li> </ul> |

Abbreviations: AE = adverse event; AUC = area under the concentration versus time curve;  $C_{max}$  = maximum observed drug concentration; hs-CRP = high-sensitivity C-reactive protein; Lp(a) = lipoprotein (a); MAD = multiple-ascending dose; PAI = plasminogen activator inhibitor; SAD = single-ascending dose; SAE = serious adverse event;  $t_{max}$  = time of  $C_{max}$ ; tPA = tissue plasminogen activator.

## 6.0 Study Design

This is a Phase 1, randomized, investigator- and subject-blinded, placebo-controlled study of LY3473329 in healthy subjects (SAD; Part A) and in otherwise healthy subjects with elevated Lp(a) ( $\geq 75$  nmol/L or 30 mg/dL; MAD; Part B).

In Part A, single-ascending doses of LY3473329 will be administered in up to 7 cohorts of 8 subjects each. Subjects will be randomly assigned to receive either LY3473329 or placebo in a 6:2 ratio. For the first cohort, 2 subjects will receive a sentinel dose (1 each with LY3473329 and placebo) with subsequent dosing of the remaining cohort after review of the safety data through 24 hours postdose. Dose escalation may occur as outlined in Section 7.4 of the protocol. All subjects will be confined to the clinical research unit (CRU) a day prior to Day 1 until all assessments are complete on Day 4. All subjects will be followed up for approximately 106 days following administration of the study drug. The follow-up period may be altered based on review of available data.

In Part B, multiple ascending doses of LY3473329 will be administered in up to 5 cohorts, with up to 10 evaluable subjects in the first 4 cohorts and 17 evaluable subjects in the last cohort. Subjects will be randomly assigned to receive either LY3473329 or placebo in a 8:2 ratio in all but the last cohort and in a 15:2 ratio in the last cohort. Subjects will receive either LY3473329 or placebo once daily (QD) for 14 days. Dose escalation may occur as outlined in Section 7.4 of the protocol. All subjects will be confined to the CRU a day prior to Day 1 and until all assessments are complete on Day 15. All subjects will be followed up for approximately 123 days following administration of the last dose of study drug. The follow-up period may be altered based on review of available data.

In both parts, the proposed doses may be adjusted after a review of available safety, PK, and additional data such as exploratory biomarkers that may include but are not limited to Lp(a) and plasminogen.

[Figure 1](#) illustrates the study design.

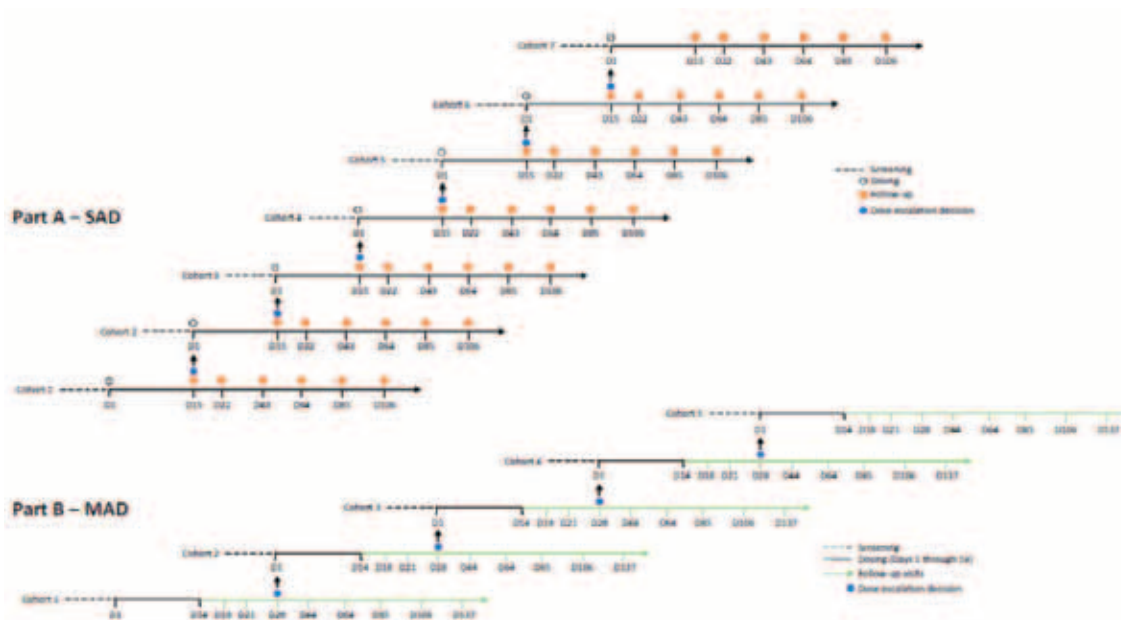

Abbreviations: D = Day; MAD = multiple-ascending dose; SAD = single-ascending dose. Overall timelines may be adjusted by 1 to 3 days to accommodate logistics across countries.

## Figure 1 Study Design

### 6.1 Sample Size Considerations

Part A: The sample size for each cohort is customary for the first-in-human study in which formal power analyses are not necessary to address the objectives associated with safety, tolerability, PK, and/or other assessments.

Part B: The sample size for each cohort, except the final cohort, is customary for a first multiple-dose study. The sample size for the final cohort of Part B has been shown, through simulations, to be optimal for detecting a clinically meaningful decrease in Lp(a) with confidence appropriate for this Phase 1 study.

## 6.2 Randomization

In Part A and Part B, subjects who meet all criteria for enrollment will be randomly assigned to receive either LY3473329 or placebo. For the first cohort in Part A, 2 subjects will receive a sentinel dose (1 each with LY3473329 and placebo), with subsequent dosing of the remaining cohort in a 5:1 ratio. The other cohorts in Part A will be randomized in a 6:2 ratio. For Part B, subjects will be randomly assigned to treatment in a 8:2 ratio in all but the last cohort and in a 15:2 ratio in the last cohort. A randomization table will be created using a computer software program. The randomization list will be provided to the designated unblinded CRU staff for subject randomization and dispensing purposes and kept in a secure location, accessible to the designated unblinded CRU staff only.

Subjects who withdraw from the study before completion of all study activities may be replaced at the discretion of the Sponsor.

## 7.0 Overview of Planned Analysis

### 7.1 Changes from Protocol

There are no changes from the protocol.

### 7.2 Interim Analysis and Key Results

Blinded interim reports will be provided for each dose escalation meeting in Parts A and B by an unblinded PRA statistician. The blinded interim reports will contain the PK data and available data for Lp(a) and plasminogen.

PK data will include Tables 12.4.2.x, 12.4.3.x and Figures 12.4.5.x, 12.4.7.x. Lp(a) data will include Table 12.5.1.2.x and Figures 12.5.1.3.x and 12.5.1.4.x. Plasminogen data will include Table 12.5.2.2.x and Figures 12.5.2.3.x and 12.5.2.4.x. An overview of the tables and figures can be found in [Appendix 4](#). Tables and figures may be updated for future dose escalation meetings as needed.

Topline tables, figures and listings (TFLs) will be provided at a time to be determined and will include:

- Lp(a) absolute and percentage change from individual baseline and also relative to placebo control
- Plasminogen activity (absolute and percentage change from baseline)
- Adverse events (AEs)
  - Listing 12.3.1.3 and
  - Table 12.3.1.4

### 7.3 Final Analysis

Draft TFLs will be provided with the draft CSR. After Sponsor comments have been incorporated, the TFLs will be finalized and incorporated in the final CSR.

## 8.0 Data Review

### 8.1 Data Management

Data handling and transfer will take place under the PRA Data Management Plan for the study.

## 8.2 Acceptance of Data for Summarization

Programming of analysis datasets and TFLs may be ongoing during the data management of the study. However, programming of analysis datasets and TFLs will be completed and quality controlled (QC'd) after database lock. Only quality assured (QA'd) results released by the Safety Laboratory, Bioanalytical Laboratory, or other external data source will be used for the programming of analysis datasets and TFLs for the final report. Any data values requiring investigation or corrections that are identified while programming the analysis datasets and TFLs will be sent to the project Data Manager. If the issue affects the TFLs, the Programmer or Statistician who identified the issue will follow it to resolution.

## 9.0 Definitions and General Analysis Methods

### 9.1 Analysis Data Presentation

#### 9.1.1 Rounding

In listings, data will be presented with the same precision as the original data. Derived data will be rounded for presentation purposes.

For all summaries, except PK data summaries, descriptive statistics will be presented with the same precision (same number of decimals or significant figures) as the data they are calculated from. Frequency percentages will be presented as integers.

For all PK data (i.e. concentrations and derived parameters) summaries, descriptive statistics will be presented as integers when values are  $\geq 100$  or presented with 3 significant digits when values are  $< 100$ . Ratios will be presented with 2 decimals. The  $t_{max}$  values and descriptive statistics thereof will be reported with 2 decimals. The coefficient of variation (CV%) will be reported with 1 decimal.

Any p-values will be reported to four decimal places; p-value less than 0.0001 will be reported as  $p < 0.0001$ .

#### 9.1.2 Imputation

Unless otherwise noted, data will not be imputed.

#### 9.1.3 Descriptive Statistics

Unless otherwise indicated, continuous variables will be summarized with the following descriptive statistics: n (number of observations), (arithmetic) mean, standard deviation (SD), minimum value, median, and maximum value.

Categorical data will be summarized with frequencies and percentages. Percentages by categories will be based on the number of subjects exposed within a treatment.

For categorical data the categories will be presented in the tables exactly as they appear in the eCRF / Database.

#### 9.1.4 Pooling

Summary statistics will be calculated by treatment (and time point, if applicable). Placebo data will be pooled for Parts A (SAD) and B (MAD) separately.

#### 9.1.5 Unscheduled Measurements

Unscheduled measurements will be included in the listings. Except for unscheduled measurements used for baseline, unscheduled measurements will be excluded from the descriptive statistics and statistical analysis.



## 9.2 Analysis Data Definitions

### 9.2.1 Baseline Definition

Unless otherwise stated, baseline for post-dose evaluations is defined as the last observation recorded before the first study drug administration. The last observation can be an unscheduled / repeated measurement.

Only for electrocardiogram (ECG) data, baseline is defined as the mean of the last recorded triplicate before the first study drug administration. If no triplicate is available before the first study drug administration, the mean of the last recorded duplicate closest to the first study drug administration will be considered as baseline. If no triplicate or duplicate is available, the last single ECG recorded before the first study drug administration will be considered as baseline.

### 9.2.2 Treatment/Subject Grouping

In summary tables, data will be presented by part and treatment.

| Label      | Grouping                                                                                                                                                                                                                                                                                                                                                                                                                                                                                                                       |
|------------|--------------------------------------------------------------------------------------------------------------------------------------------------------------------------------------------------------------------------------------------------------------------------------------------------------------------------------------------------------------------------------------------------------------------------------------------------------------------------------------------------------------------------------|
| Part       | Part A (SAD)<br>Part B (MAD)                                                                                                                                                                                                                                                                                                                                                                                                                                                                                                   |
| Cohort     | A1-A6, B1-B5                                                                                                                                                                                                                                                                                                                                                                                                                                                                                                                   |
| Treatment* | <u>Part A (SAD):</u> <ul style="list-style-type: none"> <li>- Placebo</li> <li>- 1 mg LY3473329</li> <li>- 10 mg LY3473329</li> <li>- 30 mg LY3473329</li> <li>- 100 mg LY3473329</li> <li>- 200 mg LY3473329</li> <li>- 400 mg LY3473329</li> <li>- 800 mg LY3473329</li> </ul> <u>Part B (MAD):</u> <ul style="list-style-type: none"> <li>- Placebo qd</li> <li>- 30 mg LY3473329 qd</li> <li>- 100 mg LY3473329 qd</li> <li>- 300 mg LY3473329 qd</li> <li>- 500 mg LY3473329 qd</li> <li>- 800 mg LY3473329 qd</li> </ul> |

qd = once daily

\* the proposed doses may be adjusted after a review of available safety, PK, and additional data such as exploratory biomarkers that may include but are not limited to Lp(a) and plasminogen.

### 9.2.3 Common Variable Derivations

| Variable                        | Definition/Calculation                                                                                                                                    | Variable Name (CDISC ADaM) |
|---------------------------------|-----------------------------------------------------------------------------------------------------------------------------------------------------------|----------------------------|
| Change from Baseline            | Post-dose observation minus baseline observation                                                                                                          | CHG                        |
| Percentage change from Baseline | Post-dose observation minus baseline observation / baseline observation *100                                                                              | PCHG                       |
| Analysis Study Day              | Prior to first day of dosing:<br>Date of measurement minus date of dosing<br>On or after first day of dosing: date of measurement minus date of dosing +1 | ADY                        |
| Scheduled time                  | Planned time of the assessment. Time in hours of the assessment relative to the planned time of the first drug administration.                            | ATPT/ATPTN                 |
| Actual Time                     | Actual time in hours calculated as the sampling data/time minus the date/time of the first drug administration.                                           | ARELTM                     |

### 9.2.4 QC

The analysis datasets and the TFLs will be QC'ed according to the general PRA EDS QC plan.

#### 9.2.4.1 Critical Data

The QC plan requires datasets be classified as critical or non-critical. As the primary end-point of this study are AEs and SAEs the analysis datasets considered critical are subject level analysis dataset (ADSL) and the AE analysis dataset (ADAE). As these are related to the primary objectives, these datasets will be double programmed per the QC plan. The Lp(a) and plasminogen activity data included in the laboratory analysis dataset (ADLB) will also be considered critical and will be QC'd by double programming.

### 9.2.5 ADaM Datasets and Metadata

The analysis datasets will be generated in accordance with Clinical Data Interchange Standard Consortium (CDISC) Analysis Data Model (ADaM) Version 2.1.

ADaM compliant datasets will be delivered to the sponsor. A define.xml file Version 2 with the corresponding metadata will be included. Analysis results metadata are excluded.

The following datasets will be generated:

- ADSL
- ADAE
- ADLB
- Vital Signs Analysis Dataset (ADVS)
- ECG Analysis Dataset (ADEG)
- PK Concentrations Analysis Dataset (ADPC)
- PD Concentrations Analysis Dataset (ADPD)
- PK Parameter Analysis Dataset (ADPP)

### 9.3 Software

The statistical analysis and reporting will be done using SAS® for Windows™ Version 9.4 or higher (SAS Institute, Inc.).

PK parameter calculations will primarily be done using Phoenix® WinNonlin® Version 8.1 or higher (Certara, L.P.). Additional PK and/or PD computations may be performed in SAS®.

### 9.4 Statistical Methods

#### 9.4.1 Statistical Outlier Determination

No statistical outlier analysis is planned.

#### 9.4.2 Predetermined Covariates and Prognostic Factors

There are no predetermined covariates or prognostic factors.

#### 9.4.3 Hypothesis Testing

No formal hypothesis testing will be done.

### 9.5 TFL Layout

Report layout will be according to the PRA EDS Abbreviated CSR Template. The layout of TFLs will be according to the PRA EDS standards.

No table shells will be provided. The TFLs will be provided in Adobe PDF format.

Format:

- Page size: A4
- Data in listings will be sorted by part, subject number and time point.
- Data in tables will be sorted by part, treatment and time point.
- Column titles will be in title case letters.
- All tables and listings will be in landscape format.
- The treatment labels used in TFLs will be as outlined in [Section 9.2.2](#)

## 10.0 Analysis Sets

| Analyses                 | Randomized Set | Safety Set | Pharmacokinetic Set | Pharmacodynamic Set |
|--------------------------|----------------|------------|---------------------|---------------------|
| Disposition Summaries    | ✓              |            |                     |                     |
| Safety Assessments       |                | ✓          |                     |                     |
| Baseline Characteristics |                | ✓          |                     |                     |
| PK Concentrations        |                |            | ✓                   |                     |
| PK Parameters            |                |            | ✓                   |                     |
| Lipoprotein(a)           |                |            |                     | ✓                   |
| Other PD Markers         |                |            |                     | ✓                   |

PD = pharmacodynamic; PK = pharmacokinetic

### 10.1 Randomized Set

The all subjects randomized set will consist of subjects who are assigned a randomization number in the study. This set will be used for disposition summaries.

### 10.2 Safety Set

The safety analysis set will consist of subjects randomized who received at least 1 dose of study drug regardless of whether or not they completed all protocol requirements. This set will be used for the safety data summaries and baseline characteristic summaries.

### 10.3 Pharmacokinetic Set

The PK analysis set will consist of all subjects who received at least 1 dose of LY3473329 and have sufficient concentration-time data to calculate valid estimates of the (primary) PK parameters.

### 10.4 Pharmacodynamic Set

The PD analysis set will consist of all subjects who received at least 1 dose of LY3473329 or placebo and have evaluable PD data.

## 11.0 Subject Disposition

The number and percentage of subjects randomized, dosed, and members of each analysis set will be presented. The number and percentage of subjects who withdrew from the study prematurely and a breakdown of the corresponding reasons for withdrawal will also be presented.

Individual disposition data will be listed.

## 12.0 Protocol Deviations and Violations

Protocol deviations/violations will be included in the CSR.

---

## 13.0 Demographic and Baseline Characteristics

### 13.1 Demographics

All demographic data as collected during the screening visit will be listed by subject.

Subject demographics will be summarized descriptively for all subjects by part and treatment. The summary will include the subjects' age (in years), gender, race, ethnicity, weight (in kg), height (in cm), and body mass index (BMI; in kg/m<sup>2</sup>). Subjects' age will also be presented in categories (18-64 years and >=65 years). Demographics will be summarized for the safety and PK analysis set.

### 13.2 Medical History

Medical history will be listed.

### 13.3 Other Baseline Characteristics

The results of serology tests, pregnancy tests and drug and alcohol screen will be listed.

## 14.0 Concomitant Medications

Concomitant medication will be listed by subject. Medications with an end date prior to the first dose of study drug will be considered prior medications and will be identified as such in the listing. If a partial date allows a medication to be considered concomitant it will be categorized as such.

Concomitant medications will be coded according to the WHODrug dictionary (Version Global B3 Sep2020).

## 15.0 Treatment Compliance and Exposure

Exposure data will be listed by subject.

## 16.0 Pharmacokinetic Analyses

### 16.1 Pharmacokinetic Variables

#### 16.1.1 Plasma Variables

##### 16.1.1.1 Concentrations

- Plasma concentrations of LY3473329

##### 16.1.1.2 Parameters

- PK Parameters for LY3473329 as defined in [Table 2](#)

**Table 2: Plasma PK Parameters**

| Parameter*            | Description                                                                                                                                                                                                                                                                     | SAD | MAD Day 1 | MAD Day 14 | SAS Programming Notes                                                                                                 |
|-----------------------|---------------------------------------------------------------------------------------------------------------------------------------------------------------------------------------------------------------------------------------------------------------------------------|-----|-----------|------------|-----------------------------------------------------------------------------------------------------------------------|
| C <sub>max</sub>      | Maximum plasma concentration. Observed peak analyte concentration obtained directly from the experimental data without interpolation, expressed in concentration units                                                                                                          | ✓   | ✓         | ✓          | Cmax from WNL                                                                                                         |
| t <sub>max</sub>      | Time to maximum plasma concentration. First observed time to reach peak analyte concentration obtained directly from the experimental data without interpolation, expressed in time units.                                                                                      | ✓   | ✓         | ✓          | Tmax from WNL                                                                                                         |
| AUC <sub>0-last</sub> | Area under the concentration-time curve (time 0 to time of last quantifiable concentration).                                                                                                                                                                                    | ✓   |           |            | AUClast from WNL                                                                                                      |
| AUC <sub>0-inf</sub>  | Area under the plasma concentration-time curve (time 0 to infinity). Percent extrapolation less than or equal to 20% is required to obtain a reliable AUC <sub>0-inf</sub> .                                                                                                    | ✓   |           |            | AUCINF_obs from WNL<br>If AUC_%Extrap_obs >20% then parameter is flagged                                              |
| AUC <sub>0-tau</sub>  | Area under the plasma concentration-time curve over the dosing interval (time 0 to 24 hours)                                                                                                                                                                                    |     | ✓         | ✓          | AUCtau from WNL                                                                                                       |
| λ <sub>z</sub>        | Terminal phase rate constant calculated by linear regression of the terminal log-linear portion of the concentration vs. time curve. Linear regression of at least 3 points and an adjusted r <sup>2</sup> greater than 0.80 are required to obtain a reliable λ <sub>z</sub> . | ✓   |           | ✓          | Lambda_z from WNL<br>If Rsq adjusted ≤ .80 then parameter is flagged                                                  |
| t <sub>1/2</sub>      | Terminal phase half-life expressed in time units. Percent extrapolation less than or equal to 20% and adjusted r <sup>2</sup> greater than 0.80 is required to obtain a reliable t <sub>1/2</sub> .                                                                             | ✓   |           | ✓          | HL_Lambda_z from WNL<br>If Rsq adjusted ≤ .80 then parameter is flagged                                               |
| CL/F                  | Apparent oral clearance, calculated as Dose/AUC <sub>0-inf</sub> for the SAD regimens or Dose/AUC <sub>0-tau</sub> for the MAD regimens on Day 14                                                                                                                               | ✓   |           | ✓          | CL_F_obs or CLss_F from WNL respectively.<br>If AUC_%Extrap_obs >20% or Rsq adjusted ≤ 0.80 then parameter is flagged |

| Parameter*         | Description                                                                       | SAD | MAD Day 1 | MAD Day 14 | SAS Programming Notes                                                     |
|--------------------|-----------------------------------------------------------------------------------|-----|-----------|------------|---------------------------------------------------------------------------|
| V <sub>z</sub> /F  | Apparent volume of distribution calculated as $((CL/F)/\lambda_z)$                | ✓   |           | ✓          | Vz_F_obs from WNL                                                         |
| V <sub>ss</sub> /F | Apparent volume of distribution at steady state, calculated as $CL/F * MRT_{INF}$ |     |           | ✓          | Vss_F_obs                                                                 |
| AR <sub>AUC</sub>  | Accumulation ratio AUC <sub>tau</sub>                                             |     |           | ✓          | AUC <sub>tau</sub> (Day 14)/AUC <sub>tau</sub> (Day 1), calculated in SAS |

Note: AUCs will be calculated using linear up / log down, expressed in units of concentration x time.  
 WNL = WinNonlin; \*) In end-of-text TFLs, subscript will not be used.

## 16.2 Pharmacokinetic Summaries

### 16.2.1 Pharmacokinetic Concentrations

Plasma concentrations for LY3473329 below the quantifiable limit (BQL) will be set to ½ lower limit of quantification (LLOQ) in the computation of descriptive statistics of concentration values. Descriptive statistics (number of subjects, arithmetic mean, SD, CV%, median, minimum value, maximum value, geometric mean, and geometric CV%) will be used to summarize the plasma concentrations by part and treatment at each scheduled time point. If over ½ the subjects in a given cell have values BQL then the descriptive statistics will not be presented and will instead display as BQL for the mean and minimum value. With the exception of maximum all other statistics will be missing.

Linear and semi-logarithmic plots of the geometric mean plasma concentration by scheduled sampling time will be presented by part and treatment. These plots will show time in hours. The SAD treatments will be presented in 1 plot. The full profile of the MAD treatments will be presented in 1 plot. In addition, overlay plots for the MAD treatments will be presented showing Day 1 and Day 14 in 1 plot. The plots will match the summary table results and will not have an observation at a given time point if more than half of the subjects have values BQL.

Linear and semi-logarithmic plots of combined individual plasma concentrations by actual sampling time will be provided by part and treatment. For Part B, the full profiles will be presented. These plots will show time in hours. Individual plots will use the BQL handling procedure described below for “Pharmacokinetic Parameters”.

In addition, similar plots may be presented to a specific time point in order to improve readability.

Linear and semi-logarithmic plots of the individual plasma concentrations by actual sampling time will be provided by subject (1 subject per plot, 6 plots per page). For Part B, the plots will be presented as overlay plots (Day 1 and Day 14). These plots will show time in hours. The semi-logarithmic plots will indicate the time points that were included in the terminal phase range ( $\lambda_z$  range). Individual plots will use the BQL handling procedure described below for “Pharmacokinetic Parameters”.

Individual plasma concentration data will be presented together with descriptive statistics by treatment. Individual sampling times, time deviations and comments will be listed.

Linear and semi-logarithmic plots of the mean trough (pre-dose Day 2 – Day 15) plasma LY3473329 concentrations will be provided by treatment to visually assess steady state by study day for each cohort in Part B.

## 16.2.2 Pharmacokinetic Parameters

PK parameters for LY3473329 will be estimated using non-compartmental methods with WinNonlin®.

The plasma PK parameters will be estimated from the concentration-time profiles. In estimating the PK parameters, BQL values at the beginning of the profile will be set to zero. BQL values that occur after the first quantifiable point will be considered missing. Values that are embedded between BQLs, or quantifiable values occurring after 2 or more BQLs, will be set to missing at the discretion of the pharmacokineticist. Actual sampling times, rather than scheduled sampling times, will be used in all computations involving sampling times. If the actual time or dose time is missing, the scheduled time may be substituted in order to calculate the PK parameter.

Descriptive statistics (number of subjects, arithmetic mean, SD, CV%, median, minimum value, maximum value, geometric mean, and geometric CV%) will be used to summarize the calculated PK parameters by treatment. For  $t_{max}$ , only median, min and max will be presented.

The points to be included in the  $\lambda z$  range will be determined by the pharmacokineticist after inspection of the semi-logarithmic concentration-time profiles. At least 3 points will be required to be used. The  $C_{max}$  data point will not be included.

Parameters based on adjusted  $r^2 \leq 0.80$  or %AUC<sub>extra</sub> above 20% will be flagged but not excluded from descriptive statistics.

### 16.2.2.1 Dose-Proportionality

Dose proportionality will be explored for  $C_{max}$  and AUC<sub>0-inf</sub> (for SAD) or AUC<sub>0-tau</sub> (for MAD) using the power model as described by Smith et al, 2000. If AUC<sub>0-inf</sub> cannot be calculated in many profiles rendering the relationship suspect, AUC<sub>0-last</sub> may be used instead. In the power model, the log<sub>e</sub>-transformed parameters (Y) are assumed to be linearly related to the log<sub>e</sub>-transformed Dose:

$$\log_e = \beta_0 + \beta_1 * \log_e(\text{Dose})$$

Results will be presented in a table. The table will show the results of the dose proportionality assessment as shown in Table 2 in Smith et al, 2000. If the 90% confidence Intervals (CIs) for the dose-normalized ratio of PK geometric mean values (over the full range of doses tested) is included in the interval (0.8, 1.25) dose proportionality can be assumed. The maximum fold dose range in which dose proportionality can be concluded will also be reported.

### 16.2.2.2 PK/PD Relationship

The relationship between LY3473329 PK and Lp(a) will be graphically explored (e.g. scatterplots). Relationships between PK and other biomarkers and/or QT may be graphically explored, if indicated by the data obtained.

## 17.0 Pharmacodynamic Analysis

### 17.1 Pharmacodynamic Variables

#### 17.1.1 Lipoprotein(a)

##### 17.1.1.1 Serum Concentrations

- Lipoprotein(a)
- High-density lipoprotein-cholesterol (HDL-C)
- Low-density lipoprotein-cholesterol (LDL-C)
- Triglycerides



- Total cholesterol
- Apolipoprotein B (ApoB)

## 17.1.2 Other Pharmacodynamic Markers

### 17.1.2.1 Serum Concentrations

- high-sensitivity C-reactive protein (hs-CRP)
- Plasminogen concentration
- Plasminogen activity
- Plasminogen activator inhibitor (PAI)
- Tissue plasminogen activator (tPA)
- $\alpha$ 2-antiplasmin

## 17.2 Pharmacodynamic Summaries

### 17.2.1 Lipoprotein(a)

All individual concentration data will be listed by subject.

Individual values and descriptive statistics (number of subjects, arithmetic mean, SD, CV%, median, minimum value, maximum value, geometric mean, and geometric CV%) summarizing the lipoprotein panel data (absolute observed values, derived percentage change from baseline, and percentage change relative to placebo) by part, treatment and at each scheduled day will be presented. The percentage change relative to placebo will be calculated as the individual percentage change from baseline minus pooled placebo change from baseline per timepoint.

Linear plots of the arithmetic mean serum concentrations with error bars (absolute observed values and derived percentage change from baseline) by scheduled day will be presented by part and treatment. The SAD treatments will be presented in 1 plot. The full profile of the MAD treatments will be presented in 1 plot. In addition, similar plots may be presented to a specific day in order to improve readability. Linear plots of combined individual serum concentrations (absolute observed values, derived percentage change from baseline, and percentage change relative to placebo) by actual day will be provided by part and treatment.

### 17.2.2 Other Pharmacodynamic Markers

All individual data will be listed by subject.

Biomarker endpoints will be summarized using descriptive statistics of absolute observed values and derived percentage change from baseline and presented together with the individual values by part, treatment and at each scheduled day.

Linear plots of the arithmetic mean serum concentrations with error bars (absolute observed values and derived percentage change from baseline) by scheduled day will be presented by part and treatment for each endpoint. The SAD treatments will be presented in 1 plot. The full profile of the MAD treatments will be presented in 1 plot. In addition, similar plots may be presented to a specific day in order to improve readability. Linear plots of combined individual serum concentrations (absolute observed values and derived percentage change from baseline) by actual day will be provided by part and treatment.

If a relevant change in one or more of the above mentioned PD markers is observed after treatment, then an exploratory analysis of the relationship between these PD markers may be conducted (e.g. scatterplots of plasminogen activity versus tPA). The endpoints to be tested will be determined in consultation with Eli Lilly and Company.

## 18.0 Safety Analyses

### 18.1 Safety Variables

The following safety variables will be summarized:

- AEs
- Vital Signs
  - Supine Blood Pressure
    - Systolic Blood Pressure
    - Diastolic Blood Pressure
  - Pulse Rate
  - Oral Body Temperature
  - Body Weight
- ECG
  - Heart Rate
  - PR Interval
  - QRS- Duration
  - QT Interval
  - QTc (Friderica) Interval
- Clinical Laboratory Evaluations
  - Clinical Chemistry
  - Hematology
  - Urinalysis

#### 18.1.1 Adverse Events

Treatment-emergent adverse events (TEAEs) are those which occur or worsen after the first dose of study drug.

All AEs (including non-treatment-emergent events) will be listed, including the AE description (verbatim term), Medical Dictionary for Regulatory Activities (MedDRA) system organ class (SOC) and preferred term (PT), start date and time, end date and time, severity, relation to study drug, seriousness, action taken, and outcome.

All AE summaries will include only TEAEs. TEAEs occurring following dosing will be attributed to the treatment that was received.

A breakdown of the number of events, number and percentage of subjects reporting each TEAE, categorized by SOC and PT coded according to MedDRA (Version 23.1), will be presented by treatment and overall for each part, in descending order of total number of events by SOC and PT. Subjects will only be counted once within each SOC or PT.

One table will be presented for all TEAEs and 1 table will be presented for TEAEs considered to be related to the study drug. Additionally, a summary table with TEAEs by severity and relationship to study drug will be presented by part and treatment.

TEAEs of which the relationship to study drug will be classified as 'possibly', 'likely', or 'definitely' will be regarded as related, while TEAEs that are classified as 'none', or 'unlikely' will be regarded as not related in the tables.

A listing of AEs leading to study discontinuation will be provided.

All AEs (including non-treatment-emergent events) recorded on the eCRF will be listed.

The following missing data will be imputed as defined (for calculations only / will not be presented):

- Missing AE start and / or end times for the calculation of onset and duration will be assumed to be at 00:01 for a start time and 23:59 for end times
- Missing AE severity or relationship will be assumed to be severe or related, respectively

- Missing AE start times for the determination of treatment emergence will be assumed to occur after treatment unless partial date documents the AE as happening prior to treatment
- Missing AE start times for the determination of treatment assignment will be assumed to occur after treatment on the recorded date
- Missing AE start date will be assumed to be after treatment for the determination of TEAE

For the US Clinical Trials Registry (CTR), a CTRAE summary table and the CTRAESUMM SAS dataset will be provided separately from the TFL created for CSR. The table and corresponding dataset will be created according to the specifications provided by the Sponsor.

### 18.1.2 Deaths and Serious Adverse Events

A listing of deaths and other serious adverse events (SAE) will be provided by subject.

### 18.1.3 Laboratory Data

Clinical laboratory data will be presented using standard units from the study data tabulation model (SDTM) Controlled Terminology.

All laboratory data will be listed by subject, including laboratory variables not listed in the protocol. A separate listing, including out-of-range values will also be provided. Normal ranges will be used directly from the clinical laboratory.

Descriptive statistics summarizing continuous laboratory results of clinical chemistry and hematology (absolute observed and derived changes from baseline) by treatment and scheduled time will be presented.

### 18.1.4 Vital Signs

All vital signs data will be listed by subject.

Descriptive statistics will be provided to summarize vital signs (absolute observed and derived changes from baseline) by treatment and scheduled time.

### 18.1.5 Electrocardiograms

The observed measurements for all ECG parameters and any corresponding abnormalities and Investigator's conclusion will be listed for all timepoints. The means of triplicate measurements for continuous parameters and the corresponding changes from baseline of the mean triplicate measurements at each scheduled timepoint will be listed by subject.

Descriptive statistics will be provided to summarize mean ECG parameters (absolute observed and changes from baseline) by treatment and scheduled time.

### 18.1.6 Physical Examinations

The physical examination findings (abnormalities) at screening and changes from/new findings during study or at follow-up will be listed.

## 19.0 References

SAS Institute, Inc., SAS® Version 9.4 software, Cary, NC.

Clinical Study Protocol. A Safety, Tolerability, and Pharmacokinetic Study of Single – and Multiple-Ascending Doses of LY3473329 in Healthy Subjects. Amendment (b), Final, 07 Aug 2020.

Smith BP, Vandenhende FR, DeSante KA, Farid NA, Welch PA, Callaghan JT, Fogue ST. Confidence interval criteria for assessment of dose proportionality. Pharm Res. 2000 Oct; 17(10):1278-83.

## Appendix 1: Glossary of Abbreviations

| Glossary of Abbreviations: |                                               |
|----------------------------|-----------------------------------------------|
| ADAE                       | AE analysis dataset                           |
| ADaM                       | Analysis data model                           |
| ADEG                       | ECG analysis dataset                          |
| ADLB                       | Laboratory analysis dataset                   |
| ADPC                       | PK concentrations analysis dataset            |
| ADPD                       | PD concentrations analysis dataset            |
| ADPP                       | PK parameters analysis dataset                |
| ADSL                       | Subject level analysis dataset                |
| ADVS                       | Vital signs analysis dataset                  |
| AE                         | Adverse event                                 |
| ApoB                       | Apolipoprotein B                              |
| AUC                        | Area under the concentration time curve       |
| BMI                        | Body mass index                               |
| BQL                        | Below the quantifiable limit                  |
| CDISC                      | Clinical Data Interchange Standard Consortium |
| CI                         | Confidence interval                           |
| CRU                        | Clinical research unit                        |
| CSR                        | Clinical study report                         |
| CTR                        | Clinical Trials Registry                      |
| CV%                        | Coefficient of variation                      |
| ECG                        | Electrocardiogram                             |
| eCRF                       | Electronic case report form                   |
| EDS                        | Early Development Services                    |
| HDL-C                      | High-density lipoprotein-cholesterol          |
| hs-CRP                     | high-sensitivity C-reactive protein           |
| LDL-C                      | Low-density lipoprotein - cholesterol         |
| LLOQ                       | Lower limit of quantification                 |
| Lp(a)                      | Lipoprotein(a)                                |
| MAD                        | Multiple ascending dose                       |
| MedDRA                     | Medical Dictionary for Regulatory Activities  |
| PAI                        | Plasminogen activator inhibitor               |
| PD                         | Pharmacodynamic                               |
| PK                         | Pharmacokinetic                               |

|        |                                             |
|--------|---------------------------------------------|
| PT     | Preferred term                              |
| QA'd   | Quality assured                             |
| QC'd   | Quality controlled                          |
| QD     | Once daily                                  |
| SAD    | Single-ascending dose                       |
| SAE    | Serious adverse event                       |
| SAP    | Statistical analysis plan                   |
| SD     | Standard deviation                          |
| SDTM   | Study data tabulation model                 |
| SOC    | System organ class                          |
| TEAE   | Treatment-emergent adverse event            |
| TFL(s) | Tables, figures and listings                |
| tPA    | Tissue plasminogen activator                |
| WHO-DD | World Health Organization – Drug Dictionary |
| WNL    | WinNonlin                                   |

A detailed description of the PK parameters can be found in [Table 2 Plasma PK Parameters](#).

**Appendix 2: Schedule of Assessments Single-Ascending Dose (SAD) – Part A**

| Study Day                                           | Treatment and Follow Up |                |   |   |   |                |    |    |    |    |    |    |     | ED <sup>a</sup> |
|-----------------------------------------------------|-------------------------|----------------|---|---|---|----------------|----|----|----|----|----|----|-----|-----------------|
|                                                     | -28                     | -1             | 1 | 2 | 3 | 4              | 8  | 15 | 22 | 43 | 64 | 85 | 106 |                 |
| Visit Window                                        | -                       | -              | - | - | - | -              | ±1 | ±1 | ±3 | ±3 | ±3 | ±3 | ±3  | -               |
| Visit                                               | 1 <sup>b</sup>          | 2 <sup>c</sup> |   |   |   |                | 3  | 4  | 5  | 6  | 7  | 8  | 9   | -               |
| CRU admission                                       |                         | X              |   |   |   |                |    |    |    |    |    |    |     |                 |
| CRU discharge                                       |                         |                |   |   |   | X <sup>d</sup> |    |    |    |    |    |    |     |                 |
| Informed consent                                    | X                       |                |   |   |   |                |    |    |    |    |    |    |     |                 |
| Medical history                                     | X                       |                |   |   |   |                |    |    |    |    |    |    |     |                 |
| Height                                              | X                       |                |   |   |   |                |    |    |    |    |    |    |     |                 |
| Weight                                              | X                       | X              |   |   |   |                | X  | X  |    |    |    |    |     | X               |
| Physical examination (complete [C] or directed [D]) | C                       | D              | D | D | D | D              | D  | C  | D  | D  | D  | D  | D   | C               |
| Urine drug screen and ethanol test                  | X                       | X              |   |   |   |                | X  | X  |    |    |    |    |     | X               |
| Vital signs including temperature                   | X                       |                | P | X | X | X              | X  | X  | X  | X  | X  | X  | X   | X               |
| Hematology and clinical chemistry                   | X <sup>j</sup>          | X              |   |   |   | X              | X  | X  |    |    |    |    |     | X               |
| Urinalysis <sup>k</sup>                             | X                       | X              |   |   |   |                |    |    | X  | X  | X  | X  | X   |                 |
| ECG <sup>l</sup>                                    | X                       |                | X | X | X |                |    | X  |    |    |    |    |     | X               |
| β-hCG pregnancy test                                | X                       | X              |   |   |   | X              |    |    |    |    |    |    | X   | X               |
| HIV, HCV, HBsAg                                     | X                       |                |   |   |   |                |    |    |    |    |    |    |     |                 |
| Eligibility review                                  | X                       | X              |   |   |   |                |    |    |    |    |    |    |     |                 |
| Randomization                                       |                         |                | X |   |   |                |    |    |    |    |    |    |     |                 |
| Study drug administration <sup>m</sup>              |                         |                | X |   |   |                |    |    |    |    |    |    |     |                 |
| Adverse event                                       |                         | X              | X | X | X | X              | X  | X  | X  | X  | X  | X  | X   | X               |
| Concomitant medications                             | X                       | X              | X | X | X | X              | X  | X  | X  | X  | X  | X  | X   | X               |
| PK blood sampling <sup>n</sup>                      |                         |                | X | X | X | X              | X  | X  | X  | X  | X  | X  | X   | X               |
| hs-CRP                                              | X                       |                |   | X | X |                |    |    |    |    |    |    |     |                 |
| Lipoprotein panel blood sample <sup>d</sup>         | X                       |                | P | X | X | X              | X  | X  |    |    |    |    |     | X               |
| Plasminogen concentration                           |                         |                | P | X | X |                | X  | X  | X  | X  | X  | X  | X   | X               |
| Plasminogen activity                                |                         |                | P | X | X |                | X  | X  | X  | X  | X  | X  | X   | X               |
| PAI                                                 |                         |                | P | X | X |                | X  | X  |    |    |    |    |     | X               |
| tPA                                                 |                         |                | P | X | X |                | X  | X  |    |    |    |    |     | X               |
| α <sub>2</sub> -antiplasmin                         |                         |                | P | X | X |                | X  | X  |    |    |    |    |     | X               |

Abbreviations: β-hCG = beta subunit of human chorionic gonadotropin; CRU = clinical research unit; ECG = electrocardiogram; ED = early discontinuation; HBsAg = hepatitis B surface antigen; HCV = hepatitis C virus; HDL-C = high-density lipoprotein-cholesterol; HIV = human immunodeficiency virus; hs-

## Appendix 2: Schedule of Assessments Single-Ascending Dose (SAD) – Part A (Cont.)

CRP = high-sensitivity C-reactive protein; LDL-C = low-density lipoprotein-cholesterol; Lp(a) = lipoprotein (a); P = pre-dose; PAI = plasminogen activator inhibitor; PK = pharmacokinetics; S = screening; SOP = standard operating procedure;  $t_{max}$  = time to reach the maximum observed drug concentration; tPA = tissue plasminogen activator.

- <sup>a</sup> Subjects who discontinue prior to study completion will complete the ED visit procedures.
- <sup>b</sup> Screening will be performed within 28 days prior to the study drug administration (Day 1).
- <sup>c</sup> All subjects will be confined to the CRU a day prior to Day 1 until assessments are complete on Day 4.
- <sup>d</sup> Subjects will be discharged after completing all activities on Day 4.
- <sup>e</sup> A standard urine dipstick may be used.
- <sup>f</sup> 12-Lead ECGs will be recorded in the supine position after 5 minutes rest. A single ECG will be recorded at screening and triplicate ECGs will be recorded at all other indicated time points. Triplicate ECGs will be recorded prior to blood draws when the time points coincide with blood draws; ECG recording will not exceed 5 minutes (for all 3 ECGs). On Day 1, ECG will be recorded pre-dose and at approximately 2, 4, and 6 hours after dosing.
- <sup>g</sup> Study drug will be administered in a fasting state. Fasting is considered as approximately 8 hours prior to the dose and 4 hours after the morning dose. The exact time of study drug administration will be recorded.
- <sup>h</sup> PK samples will be collected according to the PK Sampling Schedule (Appendix 6). Timing of PK sample collection may be adjusted based on clinical needs. The exact sample collection dates and times must be recorded.
- <sup>i</sup> Lipoprotein panel blood sample will include Lp(a), HDL-C, LDL-C, triglycerides, total cholesterol, and ApoB.
- <sup>j</sup> Screening laboratory tests should be done under fasting conditions.

\* All local requirements with regard to COVID-19 will be followed according to local/site SOP.

**Appendix 3: Schedule of Assessments Multiple-Ascending Dose (MAD) – Part B**

| Study Day                                         | S1             | S2             | Treatment Period |   |   |   |   |   |   |   |   |   |    |    |    | FU |    |    |    |    |    |    |    | ED |     |     |   |
|---------------------------------------------------|----------------|----------------|------------------|---|---|---|---|---|---|---|---|---|----|----|----|----|----|----|----|----|----|----|----|----|-----|-----|---|
|                                                   | -60            | -28            | -1               | 1 | 2 | 3 | 4 | 5 | 6 | 7 | 8 | 9 | 10 | 11 | 12 | 13 | 14 | 15 | 18 | 22 | 29 | 43 | 64 | 85 | 106 | 137 |   |
| Visit Window                                      |                |                |                  |   |   |   |   |   |   |   |   |   |    |    |    |    |    |    | ±1 | ±1 | ±1 | ±4 | ±3 | ±3 | ±3  | ±3  |   |
| Visit                                             | 1 <sup>b</sup> | 2 <sup>b</sup> | 3                |   |   |   |   |   |   |   |   |   |    |    |    | 4  | 5  | 6  | 7  | 8  | 9  | 10 | 11 |    |     |     |   |
| CRU admission                                     |                |                | X                |   |   |   |   |   |   |   |   |   |    |    |    |    |    |    |    |    |    |    |    |    |     |     |   |
| CRU discharge                                     |                |                |                  |   |   |   |   |   |   |   |   |   |    |    |    |    | X  |    |    |    |    |    |    |    |     |     |   |
| Informed consent                                  | X              |                |                  |   |   |   |   |   |   |   |   |   |    |    |    |    |    |    |    |    |    |    |    |    |     |     |   |
| Medical history                                   |                | X              |                  |   |   |   |   |   |   |   |   |   |    |    |    |    |    |    |    |    |    |    |    |    |     |     |   |
| Height                                            |                | X              |                  |   |   |   |   |   |   |   |   |   |    |    |    |    |    |    |    |    |    |    |    |    |     |     |   |
| Weight                                            |                | X              | X                |   |   |   |   |   |   |   |   |   |    |    |    |    | X  |    |    |    |    |    |    |    |     |     |   |
| Physical examination (complete [C] or direct [D]) |                | C              |                  | D | D | D | D | D | D | D | D | D | D  | D  | D  | D  | D  | D  | D  | D  | C  | D  | D  | D  | D   | D   | C |
| Urine drug screen and ethanol test                |                | X              | X                |   |   |   |   |   |   |   |   |   |    |    |    |    | X  | X  | X  |    | X  |    |    |    |     |     | X |
| Vital signs including temperature                 |                | X              | X                | P | X | X | X | X | X | X | X | X | X  | X  | X  | X  | X  | X  | X  | X  | X  | X  | X  | X  | X   | X   | X |
| Hematology and clinical chemistry <sup>d</sup>    |                | X              | X                | X |   |   |   |   |   | X |   |   |    |    |    | X  |    | X  | X  |    | X  |    |    |    |     |     | X |
| Urinalysis <sup>e</sup>                           |                | X              | X                |   |   |   |   |   |   |   |   |   |    |    |    |    |    | X  | X  | X  | X  | X  | X  | X  | X   | X   |   |
| ECG <sup>e</sup>                                  |                | X              |                  | X | X |   |   |   |   | X |   |   |    |    |    | X  | X  |    |    |    | X  |    |    |    |     |     | X |
| β-hCG pregnancy test                              |                | X              | X                |   |   |   |   |   |   |   |   |   |    |    |    |    | X  |    |    |    |    |    |    |    |     | X   | X |
| HIV, HCV, HBsAg                                   |                | X              |                  |   |   |   |   |   |   |   |   |   |    |    |    |    |    |    |    |    |    |    |    |    |     |     |   |
| Eligibility review                                |                | X              | X                |   |   |   |   |   |   |   |   |   |    |    |    |    |    |    |    |    |    |    |    |    |     |     |   |
| Randomization                                     |                |                | X                |   |   |   |   |   |   |   |   |   |    |    |    |    |    |    |    |    |    |    |    |    |     |     |   |
| Study drug administration <sup>g</sup>            |                |                | X                | X | X | X | X | X | X | X | X | X | X  | X  | X  | X  | X  | X  | X  | X  | X  | X  | X  | X  | X   | X   | X |
| Adverse event                                     |                |                | X                | X | X | X | X | X | X | X | X | X | X  | X  | X  | X  | X  | X  | X  | X  | X  | X  | X  | X  | X   | X   | X |
| Concomitant medications                           |                | X              | X                | X | X | X | X | X | X | X | X | X | X  | X  | X  | X  | X  | X  | X  | X  | X  | X  | X  | X  | X   | X   | X |
| PK blood sampling <sup>f</sup>                    |                |                | X                | X |   |   | X |   |   | X |   |   |    |    | X  | X  | X  | X  | X  | X  | X  | X  | X  | X  | X   | X   |   |
| hs-CRP                                            |                | X              |                  |   |   |   |   |   |   | X |   |   |    |    | X  |    |    |    |    |    |    |    |    |    |     |     |   |
| Lipoprotein panel blood sample                    | X              |                | P                | P |   |   | P |   | P | P |   |   | P  |    | P  | X  | X  | X  | X  | X  | X  | X  | X  | X  | X   | X   |   |



**Appendix 3: Schedule of Assessments Multiple-Ascending Dose (MAD) – Part B (Cont.)**

| Study Day                                | S1             | S2             | Treatment Period |   |   |   |   |   |   |   |   |   |    |    |    |    |    | FU |    |    |    |    |    |    |     |     |   | ED |
|------------------------------------------|----------------|----------------|------------------|---|---|---|---|---|---|---|---|---|----|----|----|----|----|----|----|----|----|----|----|----|-----|-----|---|----|
|                                          | -60            | -28            | -1               | 1 | 2 | 3 | 4 | 5 | 6 | 7 | 8 | 9 | 10 | 11 | 12 | 13 | 14 | 15 | 18 | 22 | 29 | 43 | 64 | 85 | 106 | 137 |   |    |
| Visit Window                             |                |                |                  |   |   |   |   |   |   |   |   |   |    |    |    |    |    |    | +1 | +1 | +1 | +4 | +3 | +3 | +3  | +3  |   |    |
| Visit                                    | 1 <sup>b</sup> | 2 <sup>b</sup> |                  |   |   |   |   |   |   | 3 |   |   |    |    |    |    |    |    | 4  | 5  | 6  | 7  | 8  | 9  | 10  | 11  |   |    |
| Plasminogen concentration <sup>‡</sup>   | X              |                |                  | P | P | P | P |   |   | P |   |   |    |    |    |    | P  | X  | X  | X  | X  | X  | X  | X  | X   | X   | X | X  |
| Plasminogen activity <sup>‡‡</sup>       | X              |                |                  | P | P | P | P |   |   | P |   |   |    |    |    |    | P  | X  | X  | X  | X  | X  | X  | X  | X   | X   | X | X  |
| PAI <sup>‡</sup>                         |                |                |                  | P | P |   |   |   |   | P |   |   |    |    |    |    | P  |    |    |    | X  |    |    |    |     |     |   | X  |
| tPA <sup>‡</sup>                         |                |                |                  | P | P |   |   |   |   | P |   |   |    |    |    |    | P  |    |    |    | X  |    |    |    |     |     |   | X  |
| α <sub>2</sub> -antiplasmin <sup>‡</sup> |                |                |                  | P | P |   |   |   |   | P |   |   |    |    |    |    | P  |    |    |    | X  |    |    |    |     |     |   | X  |
| Storage sample <sup>‡</sup>              |                |                |                  | P |   |   | X |   |   | P |   |   |    |    |    |    | P  |    |    |    | X  |    |    |    |     |     |   |    |

Abbreviations: AE = adverse event; β-hCG = beta subunit of human chorionic gonadotropin; CRU = clinical research unit; ECG = electrocardiogram; ED = early discontinuation;

FU = safety follow-up; HBsAg = hepatitis B surface antigen; HCV = hepatitis C virus; HIV = human immunodeficiency virus; hs-CRP = high-sensitivity C-reactive protein;

Lp(a) = lipoprotein (a); P = pre-dose; PAI = plasminogen activator inhibitor; PK = pharmacokinetics; S1 = screening visit 1; S2 = screening visit 2; SOP = standard operating procedure; tPA = tissue plasminogen activator.

<sup>a</sup> Subjects who discontinue the study prior to study completion will complete the ED visit procedures. The follow-up period may be altered based on review of available data such as PK, Lp(a) concentration, and plasminogen such that follow-up may cease for an individual once any AEs are resolved and Lp(a) levels and plasminogen activity return to at least 90% of baseline.

<sup>b</sup> Each subject will undergo 2 screening visits. Screening Visit 1 (S1) will be performed within 60 days before the first dose of study drug and screening Visit 2 (S2) will be performed within 28 days before the first dose of study drug. S1 must be completed at least 3 days before the first dose of study drug.

<sup>c</sup> A standard urine dipstick may be used.

<sup>d</sup> 12-Lead ECGs will be obtained in the supine position after 5 minutes rest. A single ECG will be recorded at screening and triplicate ECGs will be recorded at all other indicated time points. Triplicate ECGs will be recorded prior to blood draws when the time points coincide with blood draws; ECG recording will not exceed 5 minutes (for all 3 ECGs). On Day 1, ECGs will be collected at pre-dose and at 2, 4, and 6 hours after the dosing.

<sup>e</sup> Study drug will be administered in a fasting state, preferably at the same time every day at the CRU. Fasting is considered as approximately 8 hours prior to the dose and 4 hours after the dose. The exact time of study drug administration will be recorded.

<sup>f</sup> PK samples will be collected according to the PK Sampling Schedule (Appendix 6). If applicable, a PK sample will be obtained at the ED visit. Timing of PK sample collection may be adjusted based on clinical needs. The exact collection dates and times must be recorded.

<sup>g</sup> Biomarker samples will be collected prior to the morning dose.

<sup>h</sup> Investigator may order additional plasminogen activity samples if needed. This sampling schedule designed based on expectation of timing of the potential effect of LY3473329 on plasminogen activity

<sup>i</sup> Storage sample to be collected according to Section 9.8.

<sup>‡</sup> Screening laboratory tests should be done under fasting conditions.

<sup>‡</sup> All local requirements with regard to COVID-19 will be followed according to local site SOP.

## Appendix 4: List of End of Text Outputs

The planned TFLs for the CSR are listed below. The placement and numbering presented is for tracking/development purpose and may deviate from the placement order and numbering listed in the CSR.

This list defines the tables to be produced by programming. The medical writer can decide to insert any of the figures or create more tables in the CSR text independently of this SAP.

| <b>List of End of Text Tables, Figures and Listings:</b>  |                                                                                                          |                                               |
|-----------------------------------------------------------|----------------------------------------------------------------------------------------------------------|-----------------------------------------------|
| <b>Output</b>                                             | <b>Title</b>                                                                                             | <b>Population Set used in Tables/Figures*</b> |
| <b>Section 12.1 – Demographic and Other Baseline Data</b> |                                                                                                          |                                               |
| Section 12.1.1 Demographic Data                           |                                                                                                          |                                               |
| Listing 12.1.1.1                                          | Subject Randomization and Treatment Assignment                                                           |                                               |
| Table 12.1.1.2                                            | Summary of Subject Disposition                                                                           | Safety                                        |
| Table 12.1.1.3                                            | Summary of Demographics                                                                                  | Safety                                        |
| Table 12.1.1.4                                            | Summary of Demographics                                                                                  | PK                                            |
| Listing 12.1.1.5                                          | Subject Demographics                                                                                     |                                               |
| Listing 12.1.1.6                                          | Analysis Sets                                                                                            |                                               |
| Section 12.1.2 Other Baseline Data                        |                                                                                                          |                                               |
| Listing 12.1.2.1                                          | Medical History                                                                                          |                                               |
| Listing 12.1.2.2                                          | Prior and Concomitant Medications                                                                        |                                               |
| Listing 12.1.2.3                                          | Results of Serology Tests                                                                                |                                               |
| Listing 12.1.2.4                                          | Results of Pregnancy Tests                                                                               |                                               |
| Listing 12.1.2.5                                          | Results SARS-CoV-2 Tests                                                                                 |                                               |
| <b>Section 12.2 – Compliance Data</b>                     |                                                                                                          |                                               |
| Listing 12.2.1                                            | Study Dates                                                                                              |                                               |
| Listing 12.2.2                                            | Subject Disposition                                                                                      |                                               |
| Listing 12.2.3                                            | Study Drug Administration                                                                                |                                               |
| <b>Section 12.3 – Safety Data</b>                         |                                                                                                          |                                               |
| Section 12.3.1 – Adverse Events                           |                                                                                                          |                                               |
| Table 12.3.1.1                                            | Table of Deaths and Other Serious Adverse Events                                                         | Safety                                        |
| Listing 12.3.1.2                                          | Adverse Events Leading to Withdrawal                                                                     |                                               |
| Listing 12.3.1.3                                          | Adverse Events                                                                                           |                                               |
| Table 12.3.1.4                                            | Summary of All Treatment-Emergent Adverse Events by System Organ Class, Preferred Term and Treatment     | Safety                                        |
| Table 12.3.1.5                                            | Summary of Related Treatment-Emergent Adverse Events by System Organ Class, Preferred Term and Treatment | Safety                                        |

|                                                  |                                                                                                                        |        |
|--------------------------------------------------|------------------------------------------------------------------------------------------------------------------------|--------|
| Table 12.3.1.6                                   | Summary of Treatment-Emergent Adverse Events by Treatment, Relationship and Severity                                   | Safety |
| <b>Section 12.3.2 – Clinical Laboratory Data</b> |                                                                                                                        |        |
| Listing 12.3.2.1                                 | Clinical Laboratory Results - Clinical Chemistry                                                                       |        |
| Listing 12.3.2.2                                 | Clinical Laboratory Results - Hematology                                                                               |        |
| Listing 12.3.2.3                                 | Clinical Laboratory Results - Urinalysis                                                                               |        |
| Listing 12.3.2.4                                 | Clinical Laboratory Results - Alcohol and Drug Screen                                                                  |        |
| Listing 12.3.2.5                                 | Clinical Laboratory Results - Comments                                                                                 |        |
| Table 12.3.2.6                                   | Summary of Clinical Laboratory Data - Clinical Chemistry                                                               | Safety |
| Table 12.3.2.7                                   | Summary of Clinical Laboratory Data - Hematology                                                                       | Safety |
| Table 12.3.2.8                                   | Abnormal Laboratory Values by Subject                                                                                  | Safety |
| <b>Section 12.3.3 Vital Signs Data</b>           |                                                                                                                        |        |
| Listing 12.3.3.1                                 | Vital Signs                                                                                                            |        |
| Table 12.3.3.2                                   | Summary of Vital Signs                                                                                                 | Safety |
| <b>Section 12.3.4 ECG Data</b>                   |                                                                                                                        |        |
| Listing 12.3.4.1                                 | 12-Lead Electrocardiogram Results – Individual Parameters                                                              |        |
| Listing 12.3.4.2                                 | 12-Lead Electrocardiogram Results – Investigator’s Interpretation and Specification of Abnormalities                   |        |
| Table 12.3.4.3                                   | Summary of 12-Lead Electrocardiogram                                                                                   | Safety |
| <b>Section 12.3.5 Other Safety Data</b>          |                                                                                                                        |        |
| Listing 12.3.5.1                                 | Physical Examination Findings and Changes                                                                              |        |
| Listing 12.3.5.2                                 | Body Weight                                                                                                            |        |
| <b>Section 12.4 – Pharmacokinetic Data</b>       |                                                                                                                        |        |
| Listing 12.4.1                                   | LY3473329 Plasma Concentrations, Sampling Time Deviations and Comments                                                 |        |
| Table 12.4.2.1                                   | Individual Values and Descriptive Statistics of LY3473329 Plasma Concentrations by Treatment, Part A (SAD)             | PK     |
| Table 12.4.2.2                                   | Individual Values and Descriptive Statistics of LY3473329 Plasma Concentrations by Treatment, Part B (MAD)             | PK     |
| Table 12.4.3.1                                   | Individual Values and Descriptive Statistics of LY3473329 Plasma PK Parameters by Treatment, Part A (SAD)              | PK     |
| Table 12.4.3.2                                   | Individual Values and Descriptive Statistics of LY3473329 Plasma PK Parameters by Treatment, Part B (MAD)              | PK     |
| Table 12.4.4                                     | Dose Proportionality and Prediction of Exposure for LY3473329, Part A (SAD) and Part B (MAD)                           | PK     |
| Figure 12.4.5.1                                  | Geometric Mean LY3473329 Plasma Concentrations versus Time Profiles on Linear and Semi-Logarithmic Scale, Part A (SAD) | PK     |

|                                                 |                                                                                                                                                                                                   |        |
|-------------------------------------------------|---------------------------------------------------------------------------------------------------------------------------------------------------------------------------------------------------|--------|
| Figure 12.4.5.2                                 | Geometric Mean LY3473329 Plasma Concentrations versus Time Profiles on Linear and Semi-Logarithmic Scale, Part B (MAD) Full profiles                                                              | PK     |
| Figure 12.4.5.3                                 | Geometric Mean LY3473329 Plasma Concentrations versus Time Profiles on Linear and Semi-Logarithmic Scale, Part B (MAD) Overlay Day 1 and Day 14                                                   | PK     |
| Figure 12.4.6                                   | Geometric Mean LY3473329 Trough Plasma Concentrations versus Time Profiles on Linear and Semi-Logarithmic Scale, Part B (MAD)                                                                     | PK     |
| Figure 12.4.7.1                                 | Combined Individual LY3473329 Plasma Concentrations versus Time Profiles on Linear and Semi-Logarithmic Scale, Part A (SAD)                                                                       | Safety |
| Figure 12.4.7.2                                 | Combined Individual LY3473329 Plasma Concentrations versus Time Profiles on Linear and Semi-Logarithmic Scale, Part B (MAD)                                                                       | Safety |
| Figure 12.4.8                                   | Individual LY3473329 Plasma Concentrations versus Time Profiles on Linear and Semi-Logarithmic Scale                                                                                              | Safety |
| <b>Section 12.5 – Pharmacodynamic Data</b>      |                                                                                                                                                                                                   |        |
| Section 12.5.1 Lipoprotein Panel                |                                                                                                                                                                                                   |        |
| Listing 12.5.1.1                                | Lipoprotein Panel Concentrations and Comments                                                                                                                                                     |        |
| Table 12.5.1.2.1                                | Individual Values and Descriptive Statistics of Lipoprotein Panel Data (Absolute Values, Percentage Change from Baseline, and percent change relative to placebo) by Treatment, Part A (SAD)      | PD     |
| Table 12.5.1.2.2                                | Individual Values and Descriptive Statistics of Lipoprotein Panel Data (Absolute Values, Percentage Change from Baseline, and percent change relative to placebo) by Treatment, Part B (MAD)      | PD     |
| Figure 12.5.1.3.1                               | Arithmetic Mean $\pm$ SE Lipoprotein Panel Concentrations (Absolute Values and Percentage Change from Baseline) versus Day Profiles on Linear Scale, Part A (SAD)                                 | PD     |
| Figure 12.5.1.3.2                               | Arithmetic Mean $\pm$ SE Lipoprotein Panel Concentrations (Absolute Values and Percentage Change from Baseline) versus Day Profiles on Linear Scale, Part B (MAD)                                 | PD     |
| Figure 12.5.1.4.1                               | Combined Individual Lipoprotein Panel Concentrations (Absolute Values, Percentage Change from Baseline, and percent change relative to placebo) versus Day Profiles on Linear Scale, Part A (SAD) | PD     |
| Figure 12.5.1.4.2                               | Combined Individual Lipoprotein Panel Concentrations (Absolute Values, Percentage Change from Baseline, and percent change relative to placebo) versus Day Profiles on Linear Scale, Part B (MAD) | PD     |
| Section 12.5.2 Other Pharmacodynamic Biomarkers |                                                                                                                                                                                                   |        |
| Listing 12.5.2.1                                | Other Biomarker Concentrations and Comments                                                                                                                                                       |        |

|                                            |                                                                                                                                                                      |    |
|--------------------------------------------|----------------------------------------------------------------------------------------------------------------------------------------------------------------------|----|
| Table 12.5.2.2.1                           | Individual Values and Descriptive Statistics of Other Biomarkers (Absolute Values and Percentage Change from Baseline) by Treatment, Part A (SAD)                    | PD |
| Table 12.5.2.2.2                           | Individual Values and Descriptive Statistics of Other Biomarkers (Absolute Values and Percentage Change from Baseline) by Treatment, Part B (MAD)                    | PD |
| Figure 12.5.2.3.1                          | Arithmetic Mean $\pm$ SE Other Biomarker Concentrations (Absolute Values and Percentage Change from Baseline) versus Day Profiles on Linear Scale, Part A (SAD)      | PD |
| Figure 12.5.2.3.2                          | Arithmetic Mean $\pm$ SE Other Biomarker Concentrations (Absolute Values and Percentage Change from Baseline) versus Day Profiles on Linear Scale, Part B (MAD)      | PD |
| Figure 12.5.2.4.1                          | Combined Individual Other Biomarker Concentrations (Absolute Values and Percentage Change from Baseline) versus Day Profiles on Linear Scale, Part A (SAD)           | PD |
| Figure 12.5.2.4.2                          | Combined Individual Other Biomarker Concentrations (Absolute Values and Percentage Change from Baseline) versus Day Profiles on Linear Scale, Part B (MAD)           | PD |
| <b>Section 12.6 – Exploratory Analysis</b> |                                                                                                                                                                      |    |
| Section 12.6.1 PK/PD Relationship          |                                                                                                                                                                      |    |
|                                            | Exploratory analysis of the relationship between LY3473329 PK and Lp(a) and other biomarkers and/or QT; to be determined in consultation with Eli Lilly and Company. |    |
| Section 12.6.2 PD Relationships            |                                                                                                                                                                      |    |
|                                            | Exploratory analysis of the relationship between PD markers; to be determined in consultation with Eli Lilly and Company.                                            |    |

\* The safety set will be used for all listings.

## Document History

| Version Date | Modified/Reviewed By                                                                | Brief Summary of Changes (if created from a template, include template code) |
|--------------|-------------------------------------------------------------------------------------|------------------------------------------------------------------------------|
| 18-Aug-2020  |  | Internal review version                                                      |
| 09-Sep-2020  |                                                                                     | Internal review comments incorporated.                                       |
| 16-Oct-2020  |                                                                                     | Sponsor comments incorporated                                                |
| 17-Nov-2020  |                                                                                     | Sponsor comments incorporated                                                |
| 03-Dec-2020  |                                                                                     | Final SAP for approval                                                       |
| 07-Dec-2020  |                                                                                     | SAP Finalized V1                                                             |
| 16-Apr-2021  |                                                                                     | Version 1.1 due to protocol amendment                                        |
| 30-Sep-2021  |                                                                                     | Version 2 sponsor comments                                                   |
| 14-Oct-2021  |                                                                                     | Version 2 sponsor comments                                                   |



# PPD

**Electronic Record and Signature Disclosure:**  
Not Offered via DocuSign

|                                     |                  |                  |
|-------------------------------------|------------------|------------------|
| <b>In Person Signer Events</b>      | <b>Signature</b> | <b>Timestamp</b> |
| <b>Editor Delivery Events</b>       | <b>Status</b>    | <b>Timestamp</b> |
| <b>Agent Delivery Events</b>        | <b>Status</b>    | <b>Timestamp</b> |
| <b>Intermediary Delivery Events</b> | <b>Status</b>    | <b>Timestamp</b> |
| <b>Certified Delivery Events</b>    | <b>Status</b>    | <b>Timestamp</b> |
| <b>Carbon Copy Events</b>           | <b>Status</b>    | <b>Timestamp</b> |

Sent: 10/15/2021 6:29:27 AM

# PPD

**Electronic Record and Signature Disclosure:**

| <b>Carbon Copy Events</b>      | <b>Status</b>    | <b>Timestamp</b>      |
|--------------------------------|------------------|-----------------------|
| Not Offered via DocuSign       |                  |                       |
| <b>Witness Events</b>          | <b>Signature</b> | <b>Timestamp</b>      |
| <b>Notary Events</b>           | <b>Signature</b> | <b>Timestamp</b>      |
| <b>Envelope Summary Events</b> | <b>Status</b>    | <b>Timestamps</b>     |
| Envelope Sent                  | Hashed/Encrypted | 10/15/2021 6:29:27 AM |
| Certified Delivered            | Security Checked | 10/15/2021 8:23:48 AM |
| Signing Complete               | Security Checked | 10/15/2021 8:24:58 AM |
| Completed                      | Security Checked | 10/15/2021 8:24:58 AM |
| <b>Payment Events</b>          | <b>Status</b>    | <b>Timestamps</b>     |
