# Supplementary material
Source: PubMed Central journal article supplement (PMC10463176)
Supplement: jama-e2316503-s004.pdf [file jama-e2316503-s004.pdf]

## Data Sharing Statement

Nicholls. Muvalaplin, an Oral Small-Molecule Inhibitor of Lipoprotein(a) Formation. *JAMA*.  
Published August 28, 2023. doi:10.1001/jama.2023.16503

### Data

**Data available:** Yes

**Data types:** Deidentified participant data

**How to access data:** [www.vivli.org](http://www.vivli.org)

**When available:** With publication

### Supporting Documents

**Document types:** None

### Additional Information

**Who can access the data:** Researchers whose proposed use of the data has been approved.

**Types of analyses:** For a specified purpose.

**Mechanisms of data availability:** After approval of a proposal and with a signed data access agreement.

**Any additional restrictions:** All data with the exception of pharmacokinetic and genetic data.
